# Supplementary material for: The natural history of symptomatic COVID-19 during the first wave in Catalonia
Source: PubMed Central journal article supplement (PMC7858639; doi:10.1038/s41467-021-21100-y), 2021-02-03

# Appendix

## Contents

- Appendix..... 1
- Figure 1. Study inclusion flow chart ..... 1
- Figure 2. Log-log plot for age and risk of transition from general population to diagnosis with COVID-19 ..... 2
- Table 1. Estimated hazard ratios for age: from general population to diagnosed with COVID-19, overall and stratified by age ..... 3
- Table 2. Estimated hazard ratios for age: from general population to diagnosed with COVID-19, stratified by calendar month ..... 4
- Table 3. Estimated hazard ratios for age: from general population to diagnosed with COVID-19, stratified by region ..... 5
- Table 4. Estimated hazard ratios for age: from general population to hospitalised with COVID-19, overall and stratified by age ..... 6
- Table 5. Estimated hazard ratios for age: from general population to hospitalised with COVID-19, stratified by calendar month ..... 7
- Table 6. Estimated hazard ratios for age: from general population to hospitalised with COVID-19, stratified by region ..... 8
- Table 7. Estimated hazard ratios for age: from diagnosed with COVID-19 to hospitalised with COVID-19, overall and stratified by age ..... 9
- Table 8. Estimated hazard ratios for age: from diagnosed with COVID-19 to hospitalised with COVID-19, stratified by calendar month ..... 10
- Table 9. Estimated hazard ratios for age: from diagnosed with COVID-19 to hospitalised with COVID-19, stratified by region ..... 11
- Table 10. Estimated hazard ratios for age: from diagnosed with COVID-19 to death, overall and stratified by age ..... 12
- Table 11. Estimated hazard ratios for age: from diagnosed with COVID-19 to death, stratified by calendar month ..... 13
- Table 12. Estimated hazard ratios for age: from diagnosed with COVID-19 to death, stratified by region ..... 14
- Table 13. Estimated hazard ratios for age: from hospitalised with COVID-19 to death, overall and stratified by age ..... 16
- Table 14. Estimated hazard ratios for age: from hospitalised with COVID-19 to death, stratified by calendar month ..... 17
- Table 15. Estimated hazard ratios for age: from hospitalised with COVID-19 to death, stratified by region ..... 18
- Table 16. Estimated hazard ratios for male sex: overall and stratified by age ..... 1

|                                                                                                                 |    |
|-----------------------------------------------------------------------------------------------------------------|----|
| Table 17. Estimated hazard ratios for male sex: stratified by calendar month .....                              | 2  |
| Table 18. Estimated hazard ratios for male sex: stratified by region .....                                      | 3  |
| Table 19. Estimated hazard ratios for comorbidities: overall and stratified by age.....                         | 4  |
| Table 20. Estimated hazard ratios for comorbidities: stratified by calendar month.....                          | 9  |
| Figure 3. Comorbidities and COVID-19 transitions: stratified by calendar month (adjusted for age and sex) ..... | 12 |
| Table 21. Estimated hazard ratios for comorbidities: stratified by region .....                                 | 13 |
| Figure 4. Comorbidities and COVID-19 transitions: stratified by region (adjusted for age and sex) .....         | 17 |

# Figure 1. Study inclusion flow chart

A flow chart describing entry into the study.

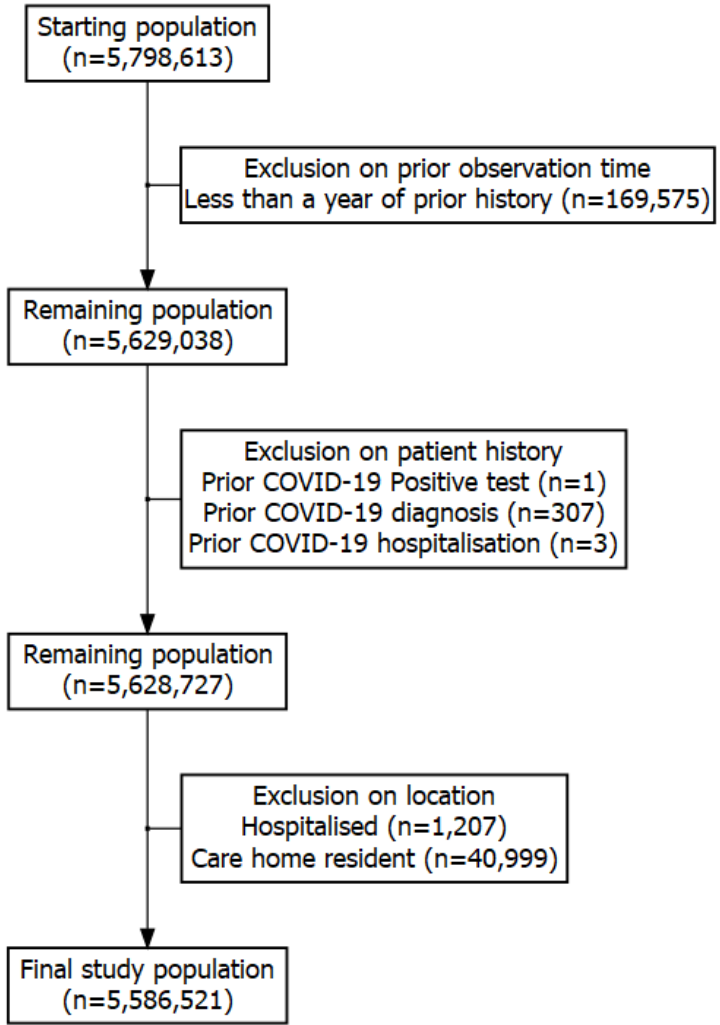

Figure 2. Log-log plot for age and risk of transition from general population to diagnosis with COVID-19

A log-log plot to assess non-proportionality in hazards.

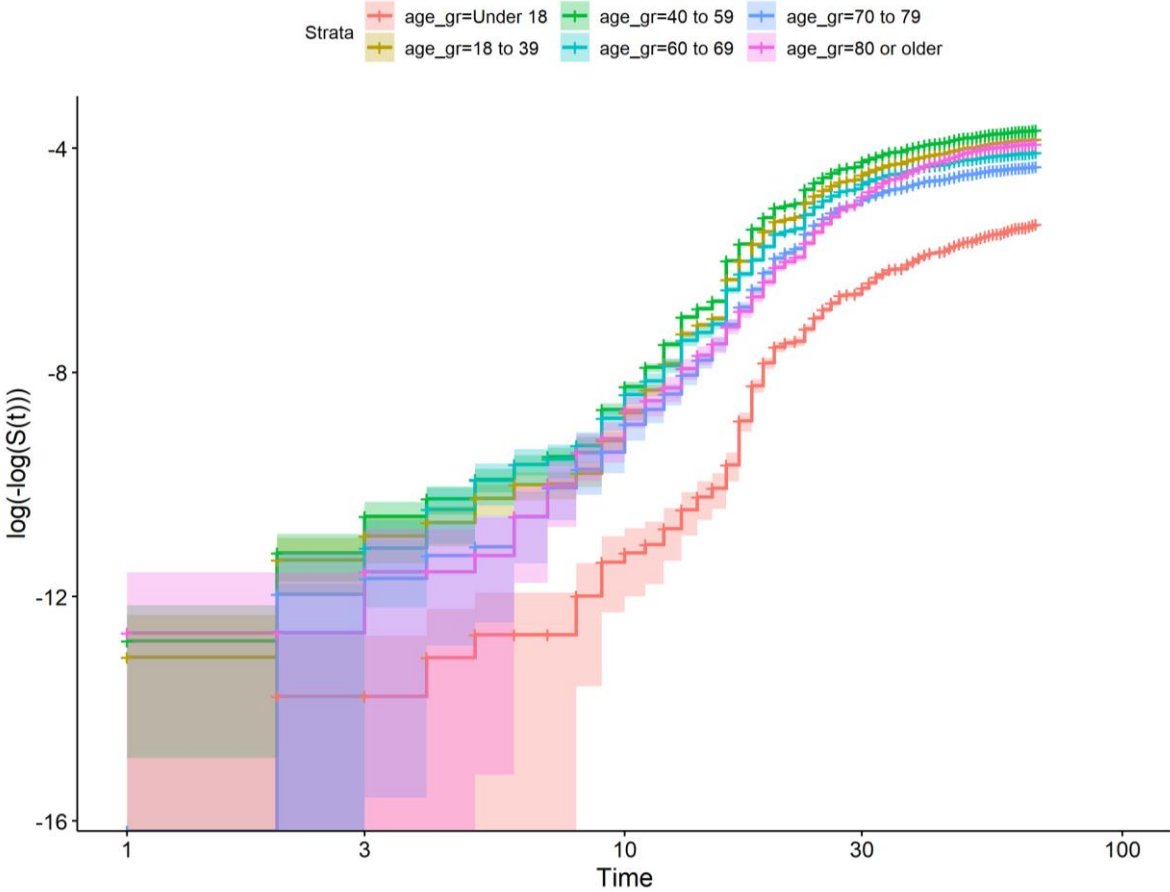

Table 1. Estimated hazard ratios for age: from general population to diagnosed with COVID-19, overall and stratified by age

| From general population to diagnosed with COVID-19  |                     |                           |                     |                           |                     |                           |
|-----------------------------------------------------|---------------------|---------------------------|---------------------|---------------------------|---------------------|---------------------------|
| Relative hazard ratios (95% CI) for age from models |                     |                           |                     |                           |                     |                           |
|                                                     | Overall             |                           | Male                |                           | Female              |                           |
| Age                                                 | Age only model      | Age and comorbidity model | Age only model      | Age and comorbidity model | Age only model      | Age and comorbidity model |
| 20                                                  | 0.70 (0.69 to 0.72) | 0.81 (0.80 to 0.83)       | 0.68 (0.66 to 0.70) | 0.80 (0.77 to 0.82)       | 0.73 (0.71 to 0.75) | 0.84 (0.82 to 0.86)       |
| 25                                                  | 0.95 (0.93 to 0.97) | 1.09 (1.07 to 1.12)       | 0.87 (0.85 to 0.90) | 1.03 (0.99 to 1.06)       | 1.02 (0.99 to 1.04) | 1.17 (1.14 to 1.20)       |
| 30                                                  | 1.22 (1.20 to 1.24) | 1.40 (1.37 to 1.42)       | 1.10 (1.07 to 1.13) | 1.28 (1.24 to 1.33)       | 1.34 (1.31 to 1.37) | 1.53 (1.49 to 1.57)       |
| 35                                                  | 1.46 (1.43 to 1.49) | 1.66 (1.62 to 1.69)       | 1.31 (1.27 to 1.34) | 1.52 (1.47 to 1.57)       | 1.62 (1.58 to 1.66) | 1.83 (1.79 to 1.88)       |
| 40                                                  | 1.60 (1.57 to 1.63) | 1.80 (1.76 to 1.84)       | 1.44 (1.40 to 1.48) | 1.65 (1.60 to 1.71)       | 1.78 (1.74 to 1.83) | 2.00 (1.95 to 2.06)       |
| 45                                                  | 1.57 (1.55 to 1.60) | 1.75 (1.72 to 1.79)       | 1.42 (1.38 to 1.46) | 1.61 (1.56 to 1.66)       | 1.75 (1.71 to 1.80) | 1.95 (1.90 to 2.00)       |
| 50                                                  | 1.41 (1.39 to 1.43) | 1.55 (1.53 to 1.57)       | 1.27 (1.25 to 1.30) | 1.41 (1.38 to 1.44)       | 1.55 (1.52 to 1.58) | 1.71 (1.68 to 1.75)       |
| 55                                                  | 1.22 (1.21 to 1.23) | 1.31 (1.30 to 1.32)       | 1.12 (1.11 to 1.13) | 1.21 (1.19 to 1.22)       | 1.31 (1.29 to 1.32) | 1.42 (1.40 to 1.43)       |
| 60                                                  | 1.07 (1.07 to 1.08) | 1.12 (1.12 to 1.13)       | 1.03 (1.02 to 1.03) | 1.07 (1.06 to 1.08)       | 1.11 (1.11 to 1.12) | 1.17 (1.16 to 1.18)       |
| 65                                                  | ref                 | ref                       | ref                 | ref                       | ref                 | ref                       |
| 70                                                  | 0.97 (0.97 to 0.97) | 0.92 (0.91 to 0.92)       | 1.01 (1.01 to 1.02) | 0.97 (0.96 to 0.98)       | 0.94 (0.93 to 0.94) | 0.88 (0.88 to 0.89)       |
| 75                                                  | 0.97 (0.96 to 0.98) | 0.86 (0.85 to 0.88)       | 1.05 (1.04 to 1.07) | 0.96 (0.94 to 0.98)       | 0.91 (0.90 to 0.92) | 0.80 (0.78 to 0.81)       |
| 80                                                  | 0.98 (0.96 to 1.00) | 0.82 (0.80 to 0.84)       | 1.11 (1.07 to 1.14) | 0.95 (0.92 to 0.99)       | 0.90 (0.88 to 0.92) | 0.73 (0.71 to 0.75)       |
| 85                                                  | 1.00 (0.97 to 1.02) | 0.78 (0.76 to 0.81)       | 1.16 (1.12 to 1.21) | 0.95 (0.91 to 1.00)       | 0.90 (0.87 to 0.93) | 0.67 (0.64 to 0.70)       |
| 90                                                  | 1.02 (0.98 to 1.05) | 0.75 (0.72 to 0.78)       | 1.22 (1.16 to 1.28) | 0.95 (0.90 to 1.01)       | 0.90 (0.86 to 0.94) | 0.62 (0.58 to 0.65)       |
| 95                                                  | 1.03 (0.99 to 1.08) | 0.71 (0.68 to 0.75)       | 1.28 (1.20 to 1.36) | 0.95 (0.89 to 1.02)       | 0.90 (0.85 to 0.95) | 0.57 (0.53 to 0.60)       |

Table 2. Estimated hazard ratios for age: from general population to diagnosed with COVID-19, stratified by calendar month

| From diagnosed with COVID-19 to hospitalised with COVID-19 |                     |                           |                     |                           |
|------------------------------------------------------------|---------------------|---------------------------|---------------------|---------------------------|
| Relative hazard ratios (95% CI) for age from models        |                     |                           |                     |                           |
|                                                            | March               |                           | April               |                           |
| Age                                                        | Age only model      | Age and comorbidity model | Age only model      | Age and comorbidity model |
| 20                                                         | 0.57 (0.55 to 0.58) | 0.64 (0.62 to 0.66)       | 0.89 (0.86 to 0.91) | 1.05 (1.02 to 1.09)       |
| 25                                                         | 0.84 (0.82 to 0.86) | 0.95 (0.92 to 0.97)       | 1.12 (1.08 to 1.15) | 1.32 (1.28 to 1.37)       |
| 30                                                         | 1.14 (1.11 to 1.16) | 1.27 (1.24 to 1.31)       | 1.37 (1.33 to 1.41) | 1.61 (1.56 to 1.67)       |
| 35                                                         | 1.38 (1.35 to 1.41) | 1.53 (1.49 to 1.57)       | 1.60 (1.55 to 1.64) | 1.86 (1.80 to 1.92)       |
| 40                                                         | 1.52 (1.48 to 1.55) | 1.67 (1.63 to 1.72)       | 1.71 (1.66 to 1.76) | 1.97 (1.91 to 2.04)       |
| 45                                                         | 1.52 (1.48 to 1.55) | 1.66 (1.61 to 1.70)       | 1.63 (1.58 to 1.68) | 1.85 (1.80 to 1.91)       |
| 50                                                         | 1.41 (1.38 to 1.43) | 1.52 (1.49 to 1.55)       | 1.40 (1.37 to 1.43) | 1.57 (1.53 to 1.60)       |
| 55                                                         | 1.25 (1.24 to 1.27) | 1.33 (1.31 to 1.35)       | 1.17 (1.15 to 1.18) | 1.28 (1.26 to 1.30)       |
| 60                                                         | 1.11 (1.11 to 1.12) | 1.15 (1.14 to 1.16)       | 1.03 (1.03 to 1.04) | 1.09 (1.08 to 1.10)       |
| 65                                                         | 1.00 (1.00 to 1.00) | 1.00 (1.00 to 1.00)       | 1.00 (1.00 to 1.00) | 1.00 (1.00 to 1.00)       |
| 70                                                         | 0.91 (0.90 to 0.92) | 0.87 (0.87 to 0.88)       | 1.04 (1.04 to 1.05) | 0.98 (0.97 to 0.98)       |
| 75                                                         | 0.83 (0.82 to 0.85) | 0.77 (0.75 to 0.78)       | 1.15 (1.13 to 1.17) | 0.99 (0.97 to 1.01)       |
| 80                                                         | 0.77 (0.75 to 0.79) | 0.67 (0.65 to 0.69)       | 1.30 (1.27 to 1.33) | 1.03 (1.00 to 1.07)       |
| 85                                                         | 0.71 (0.68 to 0.73) | 0.59 (0.57 to 0.62)       | 1.48 (1.43 to 1.53) | 1.08 (1.04 to 1.13)       |
| 90                                                         | 0.65 (0.62 to 0.68) | 0.52 (0.49 to 0.55)       | 1.68 (1.61 to 1.76) | 1.13 (1.07 to 1.20)       |
| 95                                                         | 0.60 (0.56 to 0.64) | 0.46 (0.43 to 0.49)       | 1.92 (1.81 to 2.03) | 1.18 (1.11 to 1.27)       |

Table 3. Estimated hazard ratios for age: from general population to diagnosed with COVID-19, stratified by region

| From general population to diagnosed with COVID-19  |                     |                           |                     |                           |                     |                           |                     |                           |
|-----------------------------------------------------|---------------------|---------------------------|---------------------|---------------------------|---------------------|---------------------------|---------------------|---------------------------|
| Relative hazard ratios (95% CI) for age from models |                     |                           |                     |                           |                     |                           |                     |                           |
|                                                     | Barcelona           |                           | Girona              |                           | Lleida              |                           | Tarragona           |                           |
| Age                                                 | Age only model      | Age and comorbidity model | Age only model      | Age and comorbidity model | Age only model      | Age and comorbidity model | Age only model      | Age and comorbidity model |
| 20                                                  | 0.64 (0.63 to 0.65) | 0.73 (0.71 to 0.75)       | 0.90 (0.85 to 0.96) | 1.06 (0.99 to 1.13)       | 1.00 (0.93 to 1.08) | 1.20 (1.10 to 1.32)       | 1.07 (0.97 to 1.18) | 1.28 (1.15 to 1.42)       |
| 25                                                  | 0.90 (0.88 to 0.92) | 1.03 (1.01 to 1.05)       | 1.12 (1.05 to 1.19) | 1.30 (1.22 to 1.39)       | 1.13 (1.04 to 1.22) | 1.34 (1.22 to 1.47)       | 1.40 (1.28 to 1.54) | 1.67 (1.50 to 1.87)       |
| 30                                                  | 1.18 (1.16 to 1.20) | 1.34 (1.31 to 1.37)       | 1.40 (1.32 to 1.49) | 1.62 (1.52 to 1.74)       | 1.34 (1.24 to 1.45) | 1.59 (1.45 to 1.74)       | 1.70 (1.55 to 1.87) | 2.02 (1.81 to 2.26)       |
| 35                                                  | 1.41 (1.38 to 1.44) | 1.59 (1.55 to 1.62)       | 1.71 (1.61 to 1.81) | 1.96 (1.84 to 2.10)       | 1.63 (1.51 to 1.77) | 1.92 (1.76 to 2.11)       | 1.90 (1.72 to 2.09) | 2.24 (2.01 to 2.50)       |
| 40                                                  | 1.54 (1.51 to 1.57) | 1.71 (1.68 to 1.75)       | 1.90 (1.79 to 2.02) | 2.16 (2.02 to 2.32)       | 1.88 (1.73 to 2.05) | 2.19 (2.00 to 2.41)       | 1.93 (1.74 to 2.13) | 2.25 (2.01 to 2.52)       |
| 45                                                  | 1.52 (1.49 to 1.55) | 1.68 (1.64 to 1.71)       | 1.82 (1.72 to 1.92) | 2.05 (1.93 to 2.18)       | 1.90 (1.75 to 2.06) | 2.18 (2.00 to 2.39)       | 1.78 (1.61 to 1.96) | 2.05 (1.85 to 2.28)       |
| 50                                                  | 1.38 (1.35 to 1.40) | 1.50 (1.48 to 1.53)       | 1.53 (1.47 to 1.59) | 1.71 (1.63 to 1.78)       | 1.64 (1.55 to 1.74) | 1.85 (1.73 to 1.97)       | 1.51 (1.41 to 1.63) | 1.72 (1.58 to 1.86)       |
| 55                                                  | 1.20 (1.19 to 1.21) | 1.29 (1.28 to 1.30)       | 1.25 (1.22 to 1.28) | 1.36 (1.33 to 1.40)       | 1.32 (1.28 to 1.37) | 1.45 (1.39 to 1.50)       | 1.26 (1.21 to 1.31) | 1.39 (1.32 to 1.45)       |
| 60                                                  | 1.07 (1.07 to 1.08) | 1.12 (1.11 to 1.12)       | 1.07 (1.06 to 1.08) | 1.13 (1.11 to 1.15)       | 1.10 (1.09 to 1.12) | 1.16 (1.14 to 1.18)       | 1.09 (1.07 to 1.10) | 1.15 (1.12 to 1.17)       |
| 65                                                  | 1.00 (1.00 to 1.00) | 1.00 (1.00 to 1.00)       | 1.00 (1.00 to 1.00) | 1.00 (1.00 to 1.00)       | 1.00 (1.00 to 1.00) | 1.00 (1.00 to 1.00)       | 1.00 (1.00 to 1.00) | 1.00 (1.00 to 1.00)       |
| 70                                                  | 0.97 (0.96 to 0.97) | 0.92 (0.91 to 0.93)       | 0.99 (0.97 to 1.01) | 0.93 (0.91 to 0.95)       | 0.97 (0.95 to 0.99) | 0.92 (0.90 to 0.94)       | 0.97 (0.95 to 1.00) | 0.91 (0.88 to 0.94)       |
| 75                                                  | 0.96 (0.95 to 0.97) | 0.86 (0.85 to 0.88)       | 1.02 (0.98 to 1.06) | 0.89 (0.85 to 0.93)       | 0.99 (0.95 to 1.04) | 0.88 (0.83 to 0.93)       | 0.98 (0.92 to 1.04) | 0.85 (0.79 to 0.91)       |
| 80                                                  | 0.97 (0.95 to 0.99) | 0.82 (0.80 to 0.84)       | 1.07 (1.00 to 1.13) | 0.86 (0.81 to 0.93)       | 1.04 (0.96 to 1.12) | 0.86 (0.79 to 0.94)       | 1.00 (0.91 to 1.11) | 0.80 (0.72 to 0.90)       |
| 85                                                  | 0.98 (0.95 to 1.01) | 0.78 (0.75 to 0.80)       | 1.12 (1.03 to 1.21) | 0.84 (0.76 to 0.93)       | 1.10 (0.99 to 1.22) | 0.85 (0.75 to 0.97)       | 1.04 (0.90 to 1.19) | 0.77 (0.65 to 0.90)       |
| 90                                                  | 0.99 (0.95 to 1.02) | 0.74 (0.71 to 0.77)       | 1.17 (1.05 to 1.30) | 0.82 (0.72 to 0.93)       | 1.16 (1.01 to 1.34) | 0.84 (0.71 to 0.99)       | 1.07 (0.89 to 1.28) | 0.73 (0.59 to 0.89)       |
| 95                                                  | 1.00 (0.95 to 1.04) | 0.70 (0.66 to 0.74)       | 1.23 (1.08 to 1.40) | 0.80 (0.68 to 0.93)       | 1.23 (1.03 to 1.46) | 0.83 (0.68 to 1.02)       | 1.10 (0.88 to 1.37) | 0.69 (0.54 to 0.89)       |

Table 4. Estimated hazard ratios for age: from general population to hospitalised with COVID-19, overall and stratified by age

| From general population to hospitalised with COVID-19 |                        |                           |                        |                           |                        |                           |
|-------------------------------------------------------|------------------------|---------------------------|------------------------|---------------------------|------------------------|---------------------------|
| Relative hazard ratios (95% CI) for age from models   |                        |                           |                        |                           |                        |                           |
|                                                       | Overall                |                           | Male                   |                           | Female                 |                           |
| Age                                                   | Age only model         | Age and comorbidity model | Age only model         | Age and comorbidity model | Age only model         | Age and comorbidity model |
| 20                                                    | 0.038 (0.033 to 0.043) | 0.064 (0.056 to 0.073)    | 0.026 (0.022 to 0.032) | 0.044 (0.036 to 0.053)    | 0.058 (0.049 to 0.07)  | 0.097 (0.081 to 0.12)     |
| 25                                                    | 0.059 (0.053 to 0.066) | 0.097 (0.087 to 0.11)     | 0.043 (0.037 to 0.05)  | 0.069 (0.059 to 0.08)     | 0.085 (0.073 to 0.098) | 0.14 (0.12 to 0.16)       |
| 30                                                    | 0.091 (0.084 to 0.099) | 0.14 (0.13 to 0.15)       | 0.07 (0.062 to 0.079)  | 0.11 (0.093 to 0.12)      | 0.12 (0.11 to 0.14)    | 0.19 (0.17 to 0.21)       |
| 35                                                    | 0.14 (0.13 to 0.15)    | 0.20 (0.19 to 0.22)       | 0.11 (0.10 to 0.12)    | 0.16 (0.14 to 0.17)       | 0.17 (0.16 to 0.19)    | 0.25 (0.23 to 0.28)       |
| 40                                                    | 0.20 (0.19 to 0.21)    | 0.28 (0.27 to 0.30)       | 0.17 (0.16 to 0.18)    | 0.23 (0.21 to 0.25)       | 0.24 (0.22 to 0.25)    | 0.33 (0.31 to 0.36)       |
| 45                                                    | 0.29 (0.28 to 0.30)    | 0.38 (0.37 to 0.40)       | 0.25 (0.24 to 0.26)    | 0.32 (0.31 to 0.34)       | 0.33 (0.31 to 0.34)    | 0.43 (0.41 to 0.46)       |
| 50                                                    | 0.41 (0.40 to 0.42)    | 0.51 (0.49 to 0.52)       | 0.37 (0.36 to 0.38)    | 0.45 (0.43 to 0.46)       | 0.44 (0.43 to 0.46)    | 0.55 (0.53 to 0.57)       |
| 55                                                    | 0.56 (0.55 to 0.57)    | 0.65 (0.64 to 0.66)       | 0.53 (0.52 to 0.54)    | 0.60 (0.59 to 0.61)       | 0.59 (0.58 to 0.60)    | 0.68 (0.67 to 0.70)       |
| 60                                                    | 0.76 (0.75 to 0.76)    | 0.82 (0.81 to 0.82)       | 0.73 (0.73 to 0.74)    | 0.79 (0.78 to 0.79)       | 0.77 (0.77 to 0.78)    | 0.84 (0.82 to 0.85)       |
| 65                                                    | ref                    | ref                       | ref                    | ref                       | ref                    | ref                       |
| 70                                                    | 1.29 (1.28 to 1.30)    | 1.19 (1.18 to 1.20)       | 1.33 (1.32 to 1.34)    | 1.24 (1.22 to 1.26)       | 1.27 (1.26 to 1.29)    | 1.17 (1.16 to 1.19)       |
| 75                                                    | 1.63 (1.61 to 1.66)    | 1.38 (1.36 to 1.41)       | 1.73 (1.69 to 1.77)    | 1.50 (1.46 to 1.54)       | 1.60 (1.56 to 1.64)    | 1.35 (1.31 to 1.39)       |
| 80                                                    | 2.02 (1.97 to 2.08)    | 1.57 (1.51 to 1.62)       | 2.19 (2.11 to 2.27)    | 1.76 (1.68 to 1.85)       | 1.98 (1.90 to 2.06)    | 1.53 (1.45 to 1.60)       |
| 85                                                    | 2.45 (2.35 to 2.55)    | 1.73 (1.64 to 1.82)       | 2.71 (2.56 to 2.87)    | 2.02 (1.88 to 2.16)       | 2.41 (2.28 to 2.56)    | 1.69 (1.57 to 1.82)       |
| 90                                                    | 2.91 (2.75 to 3.08)    | 1.86 (1.73 to 1.99)       | 3.27 (3.02 to 3.55)    | 2.25 (2.04 to 2.47)       | 2.90 (2.67 to 3.14)    | 1.83 (1.66 to 2.03)       |
| 95                                                    | 3.37 (3.13 to 3.64)    | 1.94 (1.78 to 2.13)       | 3.86 (3.47 to 4.30)    | 2.44 (2.15 to 2.77)       | 3.43 (3.08 to 3.82)    | 1.95 (1.71 to 2.22)       |



Table 5. Estimated hazard ratios for age: from general population to hospitalised with COVID-19, stratified by calendar month

| From general population to hospitalised with COVID-19 |                        |                           |                        |                           |
|-------------------------------------------------------|------------------------|---------------------------|------------------------|---------------------------|
| Relative hazard ratios (95% CI) for age from models   |                        |                           |                        |                           |
|                                                       | March                  |                           | April                  |                           |
| Age                                                   | Age only model         | Age and comorbidity model | Age only model         | Age and comorbidity model |
| 20                                                    | 0.035 (0.029 to 0.043) | 0.053 (0.043 to 0.065)    | 0.065 (0.052 to 0.083) | 0.10 (0.078 to 0.13)      |
| 25                                                    | 0.062 (0.052 to 0.073) | 0.091 (0.076 to 0.11)     | 0.10 (0.083 to 0.13)   | 0.16 (0.12 to 0.20)       |
| 30                                                    | 0.09 (0.077 to 0.10)   | 0.13 (0.11 to 0.16)       | 0.15 (0.13 to 0.19)    | 0.24 (0.19 to 0.29)       |
| 35                                                    | 0.11 (0.10 to 0.13)    | 0.17 (0.15 to 0.19)       | 0.22 (0.19 to 0.26)    | 0.34 (0.29 to 0.40)       |
| 40                                                    | 0.14 (0.13 to 0.15)    | 0.21 (0.19 to 0.23)       | 0.30 (0.26 to 0.34)    | 0.46 (0.40 to 0.53)       |
| 45                                                    | 0.19 (0.17 to 0.21)    | 0.28 (0.25 to 0.30)       | 0.39 (0.34 to 0.44)    | 0.57 (0.50 to 0.66)       |
| 50                                                    | 0.30 (0.27 to 0.32)    | 0.40 (0.37 to 0.43)       | 0.49 (0.44 to 0.54)    | 0.67 (0.60 to 0.75)       |
| 55                                                    | 0.48 (0.46 to 0.50)    | 0.58 (0.55 to 0.61)       | 0.61 (0.58 to 0.65)    | 0.76 (0.71 to 0.81)       |
| 60                                                    | 0.73 (0.72 to 0.74)    | 0.80 (0.78 to 0.81)       | 0.77 (0.76 to 0.79)    | 0.86 (0.84 to 0.88)       |
| 65                                                    | 1.00 (1.00 to 1.00)    | 1.00 (1.00 to 1.00)       | 1.00 (1.00 to 1.00)    | 1.00 (1.00 to 1.00)       |
| 70                                                    | 1.25 (1.24 to 1.27)    | 1.17 (1.15 to 1.18)       | 1.32 (1.30 to 1.34)    | 1.18 (1.16 to 1.21)       |
| 75                                                    | 1.48 (1.45 to 1.52)    | 1.29 (1.25 to 1.33)       | 1.76 (1.70 to 1.82)    | 1.42 (1.36 to 1.48)       |
| 80                                                    | 1.70 (1.63 to 1.77)    | 1.39 (1.32 to 1.47)       | 2.37 (2.23 to 2.51)    | 1.72 (1.60 to 1.84)       |
| 85                                                    | 1.93 (1.81 to 2.05)    | 1.49 (1.39 to 1.61)       | 3.19 (2.93 to 3.47)    | 2.08 (1.87 to 2.30)       |
| 90                                                    | 2.19 (2.02 to 2.38)    | 1.60 (1.45 to 1.76)       | 4.30 (3.84 to 4.81)    | 2.51 (2.20 to 2.87)       |
| 95                                                    | 2.49 (2.25 to 2.75)    | 1.72 (1.52 to 1.93)       | 5.79 (5.04 to 6.65)    | 3.04 (2.58 to 3.58)       |

Table 6. Estimated hazard ratios for age: from general population to hospitalised with COVID-19, stratified by region

| From general population to hospitalised with COVID-19 |                        |                           |                      |                           |                       |                           |                       |                           |
|-------------------------------------------------------|------------------------|---------------------------|----------------------|---------------------------|-----------------------|---------------------------|-----------------------|---------------------------|
| Relative hazard ratios (95% CI) for age from models   |                        |                           |                      |                           |                       |                           |                       |                           |
|                                                       | Barcelona              |                           | Girona               |                           | Lleida                |                           | Tarragona             |                           |
| Age                                                   | Age only model         | Age and comorbidity model | Age only model       | Age and comorbidity model | Age only model        | Age and comorbidity model | Age only model        | Age and comorbidity model |
| 20                                                    | 0.033 (0.028 to 0.038) | 0.056 (0.049 to 0.065)    | 0.10 (0.07 to 0.15)  | 0.17 (0.12 to 0.25)       | 0.044 (0.02 to 0.097) | 0.086 (0.039 to 0.19)     | 0.068 (0.034 to 0.14) | 0.10 (0.051 to 0.21)      |
| 25                                                    | 0.053 (0.047 to 0.059) | 0.087 (0.077 to 0.098)    | 0.13 (0.096 to 0.17) | 0.21 (0.15 to 0.29)       | 0.066 (0.035 to 0.12) | 0.12 (0.063 to 0.22)      | 0.093 (0.053 to 0.16) | 0.14 (0.077 to 0.24)      |
| 30                                                    | 0.083 (0.076 to 0.091) | 0.13 (0.12 to 0.14)       | 0.16 (0.13 to 0.21)  | 0.26 (0.20 to 0.33)       | 0.096 (0.058 to 0.16) | 0.16 (0.097 to 0.27)      | 0.13 (0.082 to 0.20)  | 0.18 (0.11 to 0.29)       |
| 35                                                    | 0.13 (0.12 to 0.14)    | 0.19 (0.18 to 0.21)       | 0.21 (0.18 to 0.25)  | 0.31 (0.25 to 0.39)       | 0.14 (0.094 to 0.20)  | 0.22 (0.15 to 0.32)       | 0.17 (0.12 to 0.24)   | 0.24 (0.16 to 0.34)       |
| 40                                                    | 0.19 (0.18 to 0.20)    | 0.27 (0.26 to 0.29)       | 0.27 (0.24 to 0.31)  | 0.38 (0.32 to 0.45)       | 0.20 (0.15 to 0.26)   | 0.29 (0.21 to 0.39)       | 0.23 (0.18 to 0.30)   | 0.31 (0.23 to 0.41)       |
| 45                                                    | 0.28 (0.27 to 0.29)    | 0.37 (0.36 to 0.39)       | 0.35 (0.31 to 0.39)  | 0.47 (0.41 to 0.53)       | 0.28 (0.23 to 0.35)   | 0.38 (0.30 to 0.48)       | 0.31 (0.26 to 0.37)   | 0.40 (0.32 to 0.49)       |
| 50                                                    | 0.40 (0.39 to 0.41)    | 0.50 (0.48 to 0.51)       | 0.45 (0.42 to 0.49)  | 0.57 (0.51 to 0.62)       | 0.39 (0.34 to 0.45)   | 0.49 (0.42 to 0.58)       | 0.42 (0.37 to 0.48)   | 0.50 (0.43 to 0.59)       |
| 55                                                    | 0.56 (0.55 to 0.57)    | 0.65 (0.63 to 0.66)       | 0.59 (0.56 to 0.62)  | 0.69 (0.64 to 0.73)       | 0.54 (0.50 to 0.59)   | 0.63 (0.57 to 0.70)       | 0.56 (0.52 to 0.61)   | 0.64 (0.58 to 0.71)       |
| 60                                                    | 0.76 (0.75 to 0.76)    | 0.82 (0.81 to 0.82)       | 0.76 (0.75 to 0.78)  | 0.83 (0.80 to 0.86)       | 0.74 (0.71 to 0.77)   | 0.80 (0.76 to 0.84)       | 0.75 (0.72 to 0.78)   | 0.80 (0.76 to 0.84)       |
| 65                                                    | 1.00 (1.00 to 1.00)    | 1.00 (1.00 to 1.00)       | 1.00 (1.00 to 1.00)  | 1.00 (1.00 to 1.00)       | 1.00 (1.00 to 1.00)   | 1.00 (1.00 to 1.00)       | 1.00 (1.00 to 1.00)   | 1.00 (1.00 to 1.00)       |
| 70                                                    | 1.29 (1.28 to 1.30)    | 1.19 (1.18 to 1.20)       | 1.31 (1.27 to 1.35)  | 1.20 (1.16 to 1.25)       | 1.34 (1.28 to 1.39)   | 1.23 (1.17 to 1.30)       | 1.33 (1.27 to 1.39)   | 1.24 (1.17 to 1.31)       |
| 75                                                    | 1.62 (1.59 to 1.65)    | 1.38 (1.35 to 1.41)       | 1.73 (1.62 to 1.84)  | 1.45 (1.32 to 1.58)       | 1.76 (1.61 to 1.93)   | 1.50 (1.34 to 1.69)       | 1.76 (1.60 to 1.94)   | 1.52 (1.34 to 1.71)       |
| 80                                                    | 1.99 (1.93 to 2.04)    | 1.55 (1.49 to 1.61)       | 2.28 (2.04 to 2.54)  | 1.73 (1.50 to 2.00)       | 2.30 (1.97 to 2.68)   | 1.81 (1.49 to 2.19)       | 2.33 (1.98 to 2.73)   | 1.85 (1.51 to 2.25)       |
| 85                                                    | 2.37 (2.27 to 2.48)    | 1.69 (1.60 to 1.78)       | 3.02 (2.57 to 3.55)  | 2.07 (1.68 to 2.54)       | 2.97 (2.36 to 3.72)   | 2.15 (1.62 to 2.84)       | 3.06 (2.42 to 3.88)   | 2.23 (1.67 to 2.97)       |
| 90                                                    | 2.77 (2.60 to 2.94)    | 1.79 (1.67 to 1.93)       | 4.01 (3.21 to 5.02)  | 2.47 (1.87 to 3.26)       | 3.78 (2.75 to 5.20)   | 2.52 (1.72 to 3.69)       | 4.03 (2.90 to 5.59)   | 2.67 (1.80 to 3.95)       |
| 95                                                    | 3.14 (2.90 to 3.41)    | 1.85 (1.68 to 2.04)       | 5.35 (4.00 to 7.18)  | 2.94 (2.05 to 4.21)       | 4.77 (3.12 to 7.29)   | 2.92 (1.77 to 4.82)       | 5.28 (3.41 to 8.15)   | 3.17 (1.90 to 5.30)       |

Table 7. Estimated hazard ratios for age: from diagnosed with COVID-19 to hospitalised with COVID-19, overall and stratified by age

| From diagnosed with COVID-19 to hospitalised with COVID-19 |                        |                           |                        |                           |                      |                           |
|------------------------------------------------------------|------------------------|---------------------------|------------------------|---------------------------|----------------------|---------------------------|
| Relative hazard ratios (95% CI) for age from models        |                        |                           |                        |                           |                      |                           |
|                                                            | Overall                |                           | Male                   |                           | Female               |                           |
| Age                                                        | Age only model         | Age and comorbidity model | Age only model         | Age and comorbidity model | Age only model       | Age and comorbidity model |
| 20                                                         | 0.076 (0.067 to 0.087) | 0.092 (0.081 to 0.11)     | 0.054 (0.044 to 0.065) | 0.061 (0.05 to 0.074)     | 0.10 (0.088 to 0.12) | 0.13 (0.11 to 0.15)       |
| 25                                                         | 0.10 (0.092 to 0.11)   | 0.12 (0.11 to 0.13)       | 0.075 (0.066 to 0.086) | 0.085 (0.074 to 0.098)    | 0.13 (0.11 to 0.15)  | 0.16 (0.14 to 0.18)       |
| 30                                                         | 0.13 (0.12 to 0.14)    | 0.15 (0.14 to 0.17)       | 0.10 (0.094 to 0.12)   | 0.12 (0.10 to 0.13)       | 0.16 (0.14 to 0.18)  | 0.18 (0.16 to 0.21)       |
| 35                                                         | 0.16 (0.15 to 0.17)    | 0.19 (0.18 to 0.21)       | 0.14 (0.13 to 0.16)    | 0.16 (0.14 to 0.18)       | 0.18 (0.16 to 0.20)  | 0.21 (0.19 to 0.24)       |
| 40                                                         | 0.19 (0.18 to 0.20)    | 0.23 (0.21 to 0.25)       | 0.19 (0.18 to 0.21)    | 0.22 (0.20 to 0.24)       | 0.20 (0.18 to 0.21)  | 0.23 (0.21 to 0.26)       |
| 45                                                         | 0.24 (0.23 to 0.26)    | 0.29 (0.27 to 0.31)       | 0.27 (0.24 to 0.29)    | 0.30 (0.27 to 0.33)       | 0.22 (0.20 to 0.24)  | 0.27 (0.24 to 0.30)       |
| 50                                                         | 0.36 (0.34 to 0.38)    | 0.41 (0.38 to 0.43)       | 0.40 (0.37 to 0.43)    | 0.43 (0.40 to 0.47)       | 0.32 (0.29 to 0.35)  | 0.37 (0.34 to 0.41)       |
| 55                                                         | 0.56 (0.54 to 0.58)    | 0.60 (0.58 to 0.62)       | 0.60 (0.58 to 0.63)    | 0.62 (0.60 to 0.65)       | 0.52 (0.49 to 0.54)  | 0.56 (0.54 to 0.59)       |
| 60                                                         | 0.80 (0.79 to 0.81)    | 0.82 (0.81 to 0.83)       | 0.82 (0.81 to 0.83)    | 0.83 (0.81 to 0.84)       | 0.77 (0.76 to 0.79)  | 0.80 (0.78 to 0.81)       |
| 65                                                         | ref                    | ref                       | ref                    | ref                       | ref                  | ref                       |
| 70                                                         | 1.13 (1.12 to 1.15)    | 1.12 (1.11 to 1.13)       | 1.12 (1.10 to 1.13)    | 1.12 (1.10 to 1.14)       | 1.16 (1.15 to 1.18)  | 1.15 (1.13 to 1.17)       |
| 75                                                         | 1.20 (1.17 to 1.23)    | 1.18 (1.15 to 1.22)       | 1.17 (1.13 to 1.21)    | 1.19 (1.15 to 1.24)       | 1.25 (1.21 to 1.29)  | 1.23 (1.18 to 1.28)       |
| 80                                                         | 1.22 (1.17 to 1.26)    | 1.21 (1.15 to 1.26)       | 1.19 (1.13 to 1.26)    | 1.24 (1.16 to 1.32)       | 1.28 (1.22 to 1.35)  | 1.26 (1.18 to 1.35)       |
| 85                                                         | 1.22 (1.16 to 1.29)    | 1.22 (1.14 to 1.30)       | 1.20 (1.11 to 1.30)    | 1.27 (1.16 to 1.40)       | 1.29 (1.19 to 1.39)  | 1.28 (1.17 to 1.41)       |
| 90                                                         | 1.22 (1.14 to 1.31)    | 1.23 (1.13 to 1.34)       | 1.21 (1.09 to 1.34)    | 1.31 (1.16 to 1.48)       | 1.29 (1.17 to 1.42)  | 1.30 (1.15 to 1.47)       |
| 95                                                         | 1.22 (1.12 to 1.34)    | 1.24 (1.12 to 1.38)       | 1.22 (1.07 to 1.38)    | 1.35 (1.16 to 1.56)       | 1.30 (1.15 to 1.47)  | 1.31 (1.13 to 1.53)       |

Table 8. Estimated hazard ratios for age: from diagnosed with COVID-19 to hospitalised with COVID-19, stratified by calendar month

| From diagnosed with COVID-19 to hospitalised with COVID-19 |                        |                           |                     |                           |
|------------------------------------------------------------|------------------------|---------------------------|---------------------|---------------------------|
| Relative hazard ratios (95% CI) for age from models        |                        |                           |                     |                           |
|                                                            | March                  |                           | April               |                           |
| Age                                                        | Age only model         | Age and comorbidity model | Age only model      | Age and comorbidity model |
| 20                                                         | 0.064 (0.054 to 0.077) | 0.08 (0.067 to 0.096)     | 0.13 (0.10 to 0.15) | 0.15 (0.13 to 0.19)       |
| 25                                                         | 0.085 (0.076 to 0.096) | 0.10 (0.092 to 0.12)      | 0.16 (0.14 to 0.18) | 0.19 (0.16 to 0.23)       |
| 30                                                         | 0.11 (0.10 to 0.12)    | 0.13 (0.12 to 0.15)       | 0.20 (0.17 to 0.23) | 0.24 (0.20 to 0.28)       |
| 35                                                         | 0.14 (0.13 to 0.16)    | 0.17 (0.16 to 0.19)       | 0.23 (0.21 to 0.27) | 0.28 (0.24 to 0.33)       |
| 40                                                         | 0.17 (0.16 to 0.19)    | 0.21 (0.19 to 0.23)       | 0.28 (0.25 to 0.31) | 0.34 (0.30 to 0.39)       |
| 45                                                         | 0.22 (0.20 to 0.24)    | 0.27 (0.24 to 0.29)       | 0.34 (0.30 to 0.38) | 0.41 (0.36 to 0.47)       |
| 50                                                         | 0.33 (0.31 to 0.36)    | 0.38 (0.36 to 0.41)       | 0.45 (0.40 to 0.50) | 0.53 (0.47 to 0.59)       |
| 55                                                         | 0.54 (0.52 to 0.56)    | 0.59 (0.56 to 0.61)       | 0.62 (0.58 to 0.66) | 0.68 (0.64 to 0.73)       |
| 60                                                         | 0.79 (0.78 to 0.80)    | 0.81 (0.80 to 0.82)       | 0.82 (0.80 to 0.84) | 0.85 (0.82 to 0.87)       |
| 65                                                         | 1.00 (1.00 to 1.00)    | 1.00 (1.00 to 1.00)       | 1.00 (1.00 to 1.00) | 1.00 (1.00 to 1.00)       |
| 70                                                         | 1.15 (1.14 to 1.17)    | 1.13 (1.11 to 1.15)       | 1.15 (1.14 to 1.17) | 1.13 (1.11 to 1.16)       |
| 75                                                         | 1.24 (1.21 to 1.28)    | 1.21 (1.17 to 1.25)       | 1.28 (1.23 to 1.32) | 1.24 (1.18 to 1.30)       |
| 80                                                         | 1.30 (1.24 to 1.37)    | 1.26 (1.19 to 1.34)       | 1.37 (1.29 to 1.46) | 1.33 (1.23 to 1.44)       |
| 85                                                         | 1.36 (1.28 to 1.46)    | 1.32 (1.22 to 1.43)       | 1.45 (1.32 to 1.59) | 1.41 (1.26 to 1.58)       |
| 90                                                         | 1.42 (1.31 to 1.55)    | 1.37 (1.24 to 1.52)       | 1.53 (1.35 to 1.73) | 1.49 (1.29 to 1.74)       |
| 95                                                         | 1.49 (1.34 to 1.66)    | 1.43 (1.26 to 1.62)       | 1.62 (1.38 to 1.88) | 1.58 (1.31 to 1.91)       |

Table 9. Estimated hazard ratios for age: from diagnosed with COVID-19 to hospitalised with COVID-19, stratified by region

| From diagnosed with COVID-19 to hospitalised with COVID-19 |                       |                           |                      |                           |                        |                           |                       |                           |
|------------------------------------------------------------|-----------------------|---------------------------|----------------------|---------------------------|------------------------|---------------------------|-----------------------|---------------------------|
| Relative hazard ratios (95% CI) for age from models        |                       |                           |                      |                           |                        |                           |                       |                           |
|                                                            | Barcelona             |                           | Girona               |                           | Lleida                 |                           | Tarragona             |                           |
| Age                                                        | Age only model        | Age and comorbidity model | Age only model       | Age and comorbidity model | Age only model         | Age and comorbidity model | Age only model        | Age and comorbidity model |
| 20                                                         | 0.07 (0.06 to 0.082)  | 0.085 (0.072 to 0.10)     | 0.13 (0.097 to 0.17) | 0.17 (0.12 to 0.23)       | 0.052 (0.031 to 0.089) | 0.063 (0.037 to 0.11)     | 0.084 (0.048 to 0.15) | 0.092 (0.05 to 0.17)      |
| 25                                                         | 0.097 (0.087 to 0.11) | 0.12 (0.10 to 0.13)       | 0.15 (0.11 to 0.19)  | 0.18 (0.14 to 0.25)       | 0.072 (0.045 to 0.11)  | 0.086 (0.053 to 0.14)     | 0.084 (0.049 to 0.14) | 0.091 (0.051 to 0.16)     |
| 30                                                         | 0.13 (0.12 to 0.14)   | 0.15 (0.14 to 0.17)       | 0.16 (0.12 to 0.21)  | 0.21 (0.15 to 0.27)       | 0.095 (0.062 to 0.15)  | 0.11 (0.072 to 0.18)      | 0.088 (0.051 to 0.15) | 0.095 (0.053 to 0.17)     |
| 35                                                         | 0.17 (0.15 to 0.18)   | 0.20 (0.18 to 0.21)       | 0.18 (0.14 to 0.23)  | 0.23 (0.18 to 0.30)       | 0.12 (0.084 to 0.17)   | 0.15 (0.099 to 0.21)      | 0.10 (0.062 to 0.16)  | 0.11 (0.064 to 0.18)      |
| 40                                                         | 0.20 (0.19 to 0.21)   | 0.24 (0.22 to 0.26)       | 0.20 (0.16 to 0.26)  | 0.26 (0.20 to 0.33)       | 0.15 (0.11 to 0.21)    | 0.19 (0.13 to 0.26)       | 0.12 (0.081 to 0.19)  | 0.14 (0.086 to 0.22)      |
| 45                                                         | 0.24 (0.23 to 0.26)   | 0.29 (0.27 to 0.31)       | 0.26 (0.21 to 0.33)  | 0.33 (0.25 to 0.42)       | 0.21 (0.16 to 0.30)    | 0.26 (0.19 to 0.37)       | 0.18 (0.12 to 0.29)   | 0.20 (0.12 to 0.32)       |
| 50                                                         | 0.35 (0.33 to 0.37)   | 0.40 (0.38 to 0.43)       | 0.39 (0.33 to 0.47)  | 0.46 (0.38 to 0.56)       | 0.35 (0.27 to 0.44)    | 0.40 (0.31 to 0.52)       | 0.32 (0.22 to 0.45)   | 0.34 (0.23 to 0.49)       |
| 55                                                         | 0.55 (0.53 to 0.57)   | 0.59 (0.57 to 0.62)       | 0.60 (0.55 to 0.65)  | 0.65 (0.59 to 0.72)       | 0.56 (0.49 to 0.63)    | 0.61 (0.54 to 0.70)       | 0.54 (0.45 to 0.65)   | 0.56 (0.46 to 0.68)       |
| 60                                                         | 0.79 (0.78 to 0.80)   | 0.81 (0.80 to 0.83)       | 0.82 (0.79 to 0.84)  | 0.84 (0.81 to 0.88)       | 0.80 (0.76 to 0.83)    | 0.83 (0.79 to 0.88)       | 0.80 (0.75 to 0.85)   | 0.80 (0.74 to 0.86)       |
| 65                                                         | 1.00 (1.00 to 1.00)   | 1.00 (1.00 to 1.00)       | 1.00 (1.00 to 1.00)  | 1.00 (1.00 to 1.00)       | 1.00 (1.00 to 1.00)    | 1.00 (1.00 to 1.00)       | 1.00 (1.00 to 1.00)   | 1.00 (1.00 to 1.00)       |
| 70                                                         | 1.14 (1.12 to 1.15)   | 1.12 (1.11 to 1.14)       | 1.14 (1.10 to 1.18)  | 1.11 (1.06 to 1.16)       | 1.14 (1.09 to 1.19)    | 1.10 (1.04 to 1.16)       | 1.12 (1.05 to 1.19)   | 1.13 (1.04 to 1.22)       |
| 75                                                         | 1.20 (1.17 to 1.22)   | 1.19 (1.15 to 1.22)       | 1.23 (1.13 to 1.33)  | 1.19 (1.07 to 1.31)       | 1.22 (1.10 to 1.34)    | 1.13 (1.00 to 1.28)       | 1.15 (1.00 to 1.33)   | 1.19 (1.00 to 1.41)       |
| 80                                                         | 1.21 (1.16 to 1.26)   | 1.21 (1.15 to 1.27)       | 1.29 (1.13 to 1.47)  | 1.24 (1.05 to 1.46)       | 1.25 (1.06 to 1.47)    | 1.13 (0.92 to 1.38)       | 1.14 (0.90 to 1.44)   | 1.20 (0.90 to 1.60)       |
| 85                                                         | 1.20 (1.13 to 1.27)   | 1.22 (1.13 to 1.31)       | 1.35 (1.12 to 1.62)  | 1.28 (1.02 to 1.62)       | 1.26 (0.99 to 1.60)    | 1.11 (0.82 to 1.48)       | 1.12 (0.80 to 1.57)   | 1.21 (0.81 to 1.81)       |
| 90                                                         | 1.20 (1.11 to 1.29)   | 1.22 (1.11 to 1.34)       | 1.42 (1.12 to 1.80)  | 1.34 (0.99 to 1.80)       | 1.27 (0.93 to 1.74)    | 1.08 (0.74 to 1.59)       | 1.10 (0.71 to 1.70)   | 1.22 (0.72 to 2.04)       |
| 95                                                         | 1.19 (1.08 to 1.31)   | 1.23 (1.10 to 1.38)       | 1.48 (1.11 to 1.99)  | 1.39 (0.97 to 2.00)       | 1.29 (0.87 to 1.90)    | 1.06 (0.67 to 1.70)       | 1.08 (0.63 to 1.85)   | 1.22 (0.65 to 2.31)       |

Table 10. Estimated hazard ratios for age: from diagnosed with COVID-19 to death, overall and stratified by age

| From diagnosed with COVID-19 to death               |                          |                           |                        |                           |                           |                           |
|-----------------------------------------------------|--------------------------|---------------------------|------------------------|---------------------------|---------------------------|---------------------------|
| Relative hazard ratios (95% CI) for age from models |                          |                           |                        |                           |                           |                           |
|                                                     | Overall                  |                           | Male                   |                           | Female                    |                           |
| Age                                                 | Age only model           | Age and comorbidity model | Age only model         | Age and comorbidity model | Age only model            | Age and comorbidity model |
| 20                                                  | 0.0074 (0.0023 to 0.024) | 0.0083 (0.0024 to 0.03)   | 0.43 (0.37 to 0.50)    | 0.0078 (0.0018 to 0.035)  | 0.0048 (0.0038 to 0.0062) | 0.0084 (0.00091 to 0.079) |
| 25                                                  | 0.0089 (0.0038 to 0.021) | 0.0099 (0.004 to 0.025)   | 0.53 (0.46 to 0.61)    | 0.0093 (0.003 to 0.029)   | 0.0058 (0.0047 to 0.0073) | 0.011 (0.0023 to 0.048)   |
| 30                                                  | 0.01 (0.0044 to 0.022)   | 0.011 (0.0047 to 0.027)   | 0.46 (0.41 to 0.53)    | 0.011 (0.0036 to 0.031)   | 0.0067 (0.0055 to 0.0082) | 0.012 (0.0031 to 0.048)   |
| 35                                                  | 0.0097 (0.0044 to 0.021) | 0.012 (0.005 to 0.027)    | 0.24 (0.21 to 0.27)    | 0.011 (0.0041 to 0.031)   | 0.007 (0.0059 to 0.0083)  | 0.012 (0.003 to 0.047)    |
| 40                                                  | 0.0081 (0.0046 to 0.014) | 0.011 (0.006 to 0.02)     | 0.066 (0.059 to 0.073) | 0.012 (0.0057 to 0.024)   | 0.0064 (0.0055 to 0.0075) | 0.0094 (0.0033 to 0.027)  |
| 45                                                  | 0.009 (0.006 to 0.014)   | 0.013 (0.0088 to 0.02)    | 0.025 (0.022 to 0.027) | 0.016 (0.0092 to 0.027)   | 0.0076 (0.0067 to 0.0087) | 0.0092 (0.0046 to 0.018)  |
| 50                                                  | 0.023 (0.016 to 0.033)   | 0.033 (0.023 to 0.047)    | 0.039 (0.036 to 0.042) | 0.039 (0.025 to 0.062)    | 0.02 (0.018 to 0.022)     | 0.022 (0.012 to 0.04)     |
| 55                                                  | 0.095 (0.077 to 0.12)    | 0.12 (0.099 to 0.15)      | 0.15 (0.14 to 0.16)    | 0.14 (0.11 to 0.18)       | 0.086 (0.08 to 0.093)     | 0.093 (0.065 to 0.13)     |
| 60                                                  | 0.35 (0.33 to 0.38)      | 0.40 (0.37 to 0.43)       | 0.50 (0.48 to 0.51)    | 0.43 (0.39 to 0.47)       | 0.33 (0.32 to 0.35)       | 0.35 (0.31 to 0.40)       |
| 65                                                  | ref                      | ref                       | ref                    | ref                       | ref                       | ref                       |
| 70                                                  | 2.30 (2.21 to 2.39)      | 2.05 (1.96 to 2.13)       | 1.41 (1.34 to 1.47)    | 1.90 (1.81 to 2.00)       | 2.44 (2.33 to 2.56)       | 2.27 (2.11 to 2.44)       |
| 75                                                  | 4.56 (4.30 to 4.82)      | 3.62 (3.41 to 3.85)       | 1.54 (1.40 to 1.69)    | 3.14 (2.90 to 3.39)       | 5.15 (4.67 to 5.67)       | 4.37 (3.93 to 4.87)       |
| 80                                                  | 8.29 (7.76 to 8.85)      | 5.91 (5.48 to 6.36)       | 1.48 (1.28 to 1.71)    | 4.79 (4.31 to 5.34)       | 9.90 (8.52 to 11.51)      | 7.63 (6.75 to 8.62)       |
| 85                                                  | 14.69 (13.58 to 15.89)   | 9.38 (8.54 to 10.29)      | 1.37 (1.12 to 1.67)    | 7.20 (6.24 to 8.30)       | 18.40 (15.00 to 22.58)    | 12.82 (11.16 to 14.73)    |
| 90                                                  | 26.00 (23.62 to 28.62)   | 14.88 (13.25 to 16.70)    | 1.27 (0.99 to 1.63)    | 10.80 (8.99 to 12.96)     | 34.14 (26.35 to 44.23)    | 21.49 (18.25 to 25.31)    |
| 95                                                  | 46.03 (40.97 to 51.71)   | 23.60 (20.52 to 27.16)    | 1.18 (0.87 to 1.59)    | 16.20 (12.94 to 20.28)    | 63.33 (46.30 to 86.64)    | 36.03 (29.71 to 43.69)    |

Table 11. Estimated hazard ratios for age: from diagnosed with COVID-19 to death, stratified by calendar month

| From diagnosed with COVID-19 to death               |                          |                           |                           |                           |
|-----------------------------------------------------|--------------------------|---------------------------|---------------------------|---------------------------|
| Relative hazard ratios (95% CI) for age from models |                          |                           |                           |                           |
|                                                     | March                    |                           | April                     |                           |
| Age                                                 | Age only model           | Age and comorbidity model | Age only model            | Age and comorbidity model |
| 20                                                  | 0.0093 (0.0019 to 0.045) | 0.013 (0.0027 to 0.062)   | 0.0031 (0.0003 to 0.032)  | 0.0052 (0.00077 to 0.035) |
| 25                                                  | 0.011 (0.0039 to 0.033)  | 0.015 (0.0051 to 0.045)   | 0.0039 (0.00065 to 0.024) | 0.0057 (0.0011 to 0.031)  |
| 30                                                  | 0.013 (0.0052 to 0.034)  | 0.017 (0.0067 to 0.046)   | 0.0047 (0.00081 to 0.027) | 0.0062 (0.0011 to 0.034)  |
| 35                                                  | 0.014 (0.0053 to 0.035)  | 0.018 (0.007 to 0.048)    | 0.005 (0.00099 to 0.025)  | 0.0067 (0.0015 to 0.031)  |
| 40                                                  | 0.012 (0.0058 to 0.025)  | 0.017 (0.008 to 0.035)    | 0.005 (0.0017 to 0.015)   | 0.0076 (0.0028 to 0.021)  |
| 45                                                  | 0.013 (0.0073 to 0.022)  | 0.018 (0.01 to 0.032)     | 0.0073 (0.0039 to 0.014)  | 0.012 (0.0064 to 0.022)   |
| 50                                                  | 0.029 (0.018 to 0.048)   | 0.041 (0.025 to 0.067)    | 0.021 (0.013 to 0.035)    | 0.033 (0.02 to 0.054)     |
| 55                                                  | 0.11 (0.082 to 0.15)     | 0.14 (0.10 to 0.18)       | 0.091 (0.067 to 0.12)     | 0.12 (0.09 to 0.16)       |
| 60                                                  | 0.37 (0.34 to 0.41)      | 0.42 (0.38 to 0.46)       | 0.35 (0.31 to 0.39)       | 0.40 (0.35 to 0.45)       |
| 65                                                  | 1.00 (1.00 to 1.00)      | 1.00 (1.00 to 1.00)       | 1.00 (1.00 to 1.00)       | 1.00 (1.00 to 1.00)       |
| 70                                                  | 2.25 (2.15 to 2.35)      | 2.01 (1.91 to 2.11)       | 2.29 (2.14 to 2.45)       | 2.03 (1.90 to 2.18)       |
| 75                                                  | 4.51 (4.22 to 4.82)      | 3.59 (3.33 to 3.87)       | 4.43 (4.02 to 4.88)       | 3.53 (3.19 to 3.90)       |
| 80                                                  | 8.61 (7.91 to 9.37)      | 6.12 (5.52 to 6.78)       | 7.63 (6.84 to 8.51)       | 5.50 (4.89 to 6.19)       |
| 85                                                  | 16.34 (14.60 to 18.27)   | 10.37 (9.04 to 11.90)     | 12.41 (11.01 to 13.99)    | 8.13 (7.11 to 9.30)       |
| 90                                                  | 31.00 (26.88 to 35.77)   | 17.57 (14.74 to 20.93)    | 20.00 (17.43 to 22.95)    | 11.92 (10.16 to 13.98)    |
| 95                                                  | 58.84 (49.37 to 70.13)   | 29.76 (24.01 to 36.88)    | 32.23 (27.42 to 37.89)    | 17.46 (14.44 to 21.11)    |





|    |                           |                           |                                     |                        |                            |                        |                         |                       |
|----|---------------------------|---------------------------|-------------------------------------|------------------------|----------------------------|------------------------|-------------------------|-----------------------|
| 75 | 4.56<br>(4.29 to 4.86)    | 3.59 (3.36 to 3.84)       | 8.82<br>(6.78 to 11.48)             | 3.60 (2.82 to 4.61)    | 4.86 (3.26 to 7.25)        | 4.82 (2.92 to 7.97)    | 4.19 (2.91 to 6.03)     | 3.97 (2.73 to 5.76)   |
| 80 | 8.32<br>(7.75 to 8.94)    | 5.84 (5.38 to 6.34)       | 40.53<br>(27.04 to 60.75)           | 5.86 (4.02 to 8.55)    | 9.39 (5.08 to 17.36)       | 8.28 (4.78 to 14.34)   | 7.11 (4.06 to 12.46)    | 6.35 (3.58 to 11.27)  |
| 85 | 14.79<br>(13.57 to 16.11) | 9.24 (8.35 to 10.24)      | 193.13<br>(111.81 to 333.61)        | 9.41 (5.65 to 15.66)   | 17.74<br>(7.72 to 40.79)   | 13.63 (7.46 to 24.90)  | 11.84 (5.54 to 25.30)   | 9.94 (4.58 to 21.60)  |
| 90 | 26.25<br>(23.65 to 29.15) | 14.63<br>(12.89 to 16.61) | 920.29<br>(462.28 to 1,832.08)      | 15.10 (7.95 to 28.67)  | 33.50<br>(11.71 to 95.79)  | 22.42 (11.25 to 44.69) | 19.73 (7.58 to 51.36)   | 15.56 (5.85 to 41.38) |
| 95 | 46.62<br>(41.07 to 52.92) | 23.16<br>(19.86 to 27.01) | 4,385.19<br>(1,911.29 to 10,061.20) | 24.23 (11.18 to 52.52) | 63.24<br>(17.78 to 224.96) | 36.88 (16.58 to 82.07) | 32.87 (10.36 to 104.27) | 24.36 (7.48 to 79.30) |

Table 13. Estimated hazard ratios for age: from hospitalised with COVID-19 to death, overall and stratified by age

| From hospitalised with COVID-19 to death            |                        |                           |                       |                           |                        |                           |
|-----------------------------------------------------|------------------------|---------------------------|-----------------------|---------------------------|------------------------|---------------------------|
| Relative hazard ratios (95% CI) for age from models |                        |                           |                       |                           |                        |                           |
|                                                     | Overall                |                           | Male                  |                           | Female                 |                           |
| Age                                                 | Age only model         | Age and comorbidity model | Age only model        | Age and comorbidity model | Age only model         | Age and comorbidity model |
| 20                                                  | 0.052 (0.02 to 0.14)   | 0.072 (0.028 to 0.19)     | 0.054 (0.016 to 0.18) | 0.072 (0.022 to 0.24)     | 0.057 (0.011 to 0.29)  | 0.076 (0.015 to 0.37)     |
| 25                                                  | 0.066 (0.03 to 0.15)   | 0.088 (0.041 to 0.19)     | 0.067 (0.025 to 0.18) | 0.088 (0.033 to 0.24)     | 0.074 (0.02 to 0.27)   | 0.093 (0.026 to 0.33)     |
| 30                                                  | 0.084 (0.045 to 0.16)  | 0.11 (0.059 to 0.20)      | 0.084 (0.039 to 0.18) | 0.11 (0.05 to 0.23)       | 0.095 (0.034 to 0.26)  | 0.11 (0.042 to 0.31)      |
| 35                                                  | 0.11 (0.068 to 0.17)   | 0.13 (0.086 to 0.21)      | 0.10 (0.059 to 0.18)  | 0.13 (0.075 to 0.24)      | 0.12 (0.058 to 0.26)   | 0.14 (0.067 to 0.29)      |
| 40                                                  | 0.14 (0.099 to 0.19)   | 0.17 (0.12 to 0.23)       | 0.13 (0.087 to 0.19)  | 0.16 (0.11 to 0.24)       | 0.16 (0.093 to 0.27)   | 0.17 (0.10 to 0.29)       |
| 45                                                  | 0.18 (0.14 to 0.23)    | 0.21 (0.16 to 0.27)       | 0.17 (0.12 to 0.23)   | 0.20 (0.15 to 0.28)       | 0.21 (0.14 to 0.32)    | 0.22 (0.14 to 0.34)       |
| 50                                                  | 0.25 (0.20 to 0.31)    | 0.28 (0.22 to 0.35)       | 0.23 (0.17 to 0.30)   | 0.27 (0.20 to 0.36)       | 0.28 (0.19 to 0.42)    | 0.29 (0.19 to 0.44)       |
| 55                                                  | 0.37 (0.30 to 0.44)    | 0.40 (0.34 to 0.49)       | 0.34 (0.27 to 0.43)   | 0.39 (0.31 to 0.50)       | 0.40 (0.30 to 0.55)    | 0.41 (0.30 to 0.56)       |
| 60                                                  | 0.59 (0.54 to 0.65)    | 0.63 (0.58 to 0.69)       | 0.58 (0.52 to 0.65)   | 0.63 (0.56 to 0.70)       | 0.61 (0.53 to 0.70)    | 0.63 (0.54 to 0.72)       |
| 65                                                  | ref                    | ref                       | ref                   | ref                       | ref                    | ref                       |
| 70                                                  | 1.69 (1.61 to 1.78)    | 1.54 (1.46 to 1.62)       | 1.63 (1.53 to 1.75)   | 1.50 (1.40 to 1.61)       | 1.81 (1.67 to 1.95)    | 1.64 (1.51 to 1.78)       |
| 75                                                  | 2.75 (2.47 to 3.06)    | 2.25 (2.01 to 2.52)       | 2.51 (2.17 to 2.89)   | 2.12 (1.83 to 2.46)       | 3.30 (2.78 to 3.91)    | 2.62 (2.20 to 3.13)       |
| 80                                                  | 4.16 (3.64 to 4.75)    | 3.15 (2.74 to 3.62)       | 3.63 (3.08 to 4.29)   | 2.91 (2.44 to 3.47)       | 5.44 (4.36 to 6.79)    | 3.91 (3.10 to 4.93)       |
| 85                                                  | 5.93 (5.23 to 6.73)    | 4.25 (3.71 to 4.88)       | 5.10 (4.36 to 5.96)   | 3.93 (3.32 to 4.66)       | 8.12 (6.53 to 10.11)   | 5.44 (4.30 to 6.88)       |
| 90                                                  | 8.28 (7.34 to 9.34)    | 5.68 (4.97 to 6.50)       | 7.07 (6.05 to 8.26)   | 5.28 (4.44 to 6.29)       | 11.53 (9.40 to 14.13)  | 7.33 (5.84 to 9.19)       |
| 95                                                  | 11.53 (10.10 to 13.17) | 7.58 (6.53 to 8.81)       | 9.81 (8.19 to 11.76)  | 7.10 (5.79 to 8.69)       | 16.22 (13.16 to 19.99) | 9.81 (7.72 to 12.47)      |

Table 14. Estimated hazard ratios for age: from hospitalised with COVID-19 to death, stratified by calendar month

| From hospitalised with COVID-19 to death            |                       |                           |                        |                           |
|-----------------------------------------------------|-----------------------|---------------------------|------------------------|---------------------------|
| Relative hazard ratios (95% CI) for age from models |                       |                           |                        |                           |
|                                                     | March                 |                           | April                  |                           |
| Age                                                 | Age only model        | Age and comorbidity model | Age only model         | Age and comorbidity model |
| 20                                                  | 0.052 (0.017 to 0.16) | 0.071 (0.023 to 0.22)     | 0.041 (0.0062 to 0.27) | 0.056 (0.0087 to 0.36)    |
| 25                                                  | 0.068 (0.027 to 0.17) | 0.089 (0.035 to 0.22)     | 0.054 (0.012 to 0.25)  | 0.071 (0.016 to 0.32)     |
| 30                                                  | 0.087 (0.042 to 0.18) | 0.11 (0.054 to 0.23)      | 0.072 (0.022 to 0.23)  | 0.091 (0.029 to 0.28)     |
| 35                                                  | 0.11 (0.065 to 0.20)  | 0.14 (0.081 to 0.24)      | 0.095 (0.041 to 0.22)  | 0.12 (0.051 to 0.27)      |
| 40                                                  | 0.15 (0.099 to 0.22)  | 0.18 (0.12 to 0.26)       | 0.13 (0.07 to 0.23)    | 0.15 (0.083 to 0.27)      |
| 45                                                  | 0.19 (0.14 to 0.26)   | 0.23 (0.17 to 0.30)       | 0.17 (0.10 to 0.28)    | 0.20 (0.12 to 0.33)       |
| 50                                                  | 0.26 (0.20 to 0.34)   | 0.30 (0.23 to 0.39)       | 0.25 (0.16 to 0.39)    | 0.28 (0.17 to 0.44)       |
| 55                                                  | 0.38 (0.31 to 0.47)   | 0.42 (0.34 to 0.52)       | 0.37 (0.27 to 0.52)    | 0.41 (0.30 to 0.58)       |
| 60                                                  | 0.60 (0.53 to 0.67)   | 0.63 (0.57 to 0.71)       | 0.60 (0.53 to 0.68)    | 0.64 (0.57 to 0.74)       |
| 65                                                  | 1.00 (1.00 to 1.00)   | 1.00 (1.00 to 1.00)       | 1.00 (1.00 to 1.00)    | 1.00 (1.00 to 1.00)       |
| 70                                                  | 1.75 (1.64 to 1.85)   | 1.59 (1.50 to 1.69)       | 1.68 (1.53 to 1.84)    | 1.51 (1.36 to 1.66)       |
| 75                                                  | 2.92 (2.56 to 3.32)   | 2.41 (2.10 to 2.75)       | 2.77 (2.27 to 3.38)    | 2.22 (1.80 to 2.74)       |
| 80                                                  | 4.25 (3.63 to 4.96)   | 3.26 (2.77 to 3.84)       | 4.39 (3.42 to 5.65)    | 3.25 (2.49 to 4.23)       |
| 85                                                  | 5.60 (4.84 to 6.47)   | 4.09 (3.50 to 4.79)       | 6.73 (5.25 to 8.63)    | 4.73 (3.63 to 6.18)       |
| 90                                                  | 7.15 (6.19 to 8.26)   | 5.01 (4.27 to 5.89)       | 10.13 (8.02 to 12.81)  | 6.88 (5.32 to 8.90)       |
| 95                                                  | 9.12 (7.72 to 10.79)  | 6.14 (5.09 to 7.42)       | 15.21 (11.95 to 19.36) | 10.01 (7.64 to 13.10)     |

Table 15. Estimated hazard ratios for age: from hospitalised with COVID-19 to death, stratified by region

| From hospitalised with COVID-19 to death            |                        |                           |                        |                           |                       |                           |                      |                           |
|-----------------------------------------------------|------------------------|---------------------------|------------------------|---------------------------|-----------------------|---------------------------|----------------------|---------------------------|
| Relative hazard ratios (95% CI) for age from models |                        |                           |                        |                           |                       |                           |                      |                           |
|                                                     | Barcelona              |                           | Girona                 |                           | Lleida                |                           | Tarragona            |                           |
| Age                                                 | Age only model         | Age and comorbidity model | Age only model         | Age and comorbidity model | Age only model        | Age and comorbidity model | Age only model       | Age and comorbidity model |
| 20                                                  | 0.049 (0.017 to 0.14)  | 0.069 (0.024 to 0.20)     | 0.029 (0.016 to 0.051) | 0.035 (0.017 to 0.071)    | 0.043 (0.02 to 0.091) | 0.081 (0.032 to 0.21)     | 0.08 (0.028 to 0.22) | 0.20 (0.056 to 0.71)      |
| 25                                                  | 0.062 (0.026 to 0.15)  | 0.083 (0.035 to 0.20)     | 0.042 (0.025 to 0.071) | 0.051 (0.027 to 0.095)    | 0.061 (0.031 to 0.12) | 0.11 (0.046 to 0.25)      | 0.11 (0.042 to 0.26) | 0.24 (0.077 to 0.73)      |
| 30                                                  | 0.078 (0.039 to 0.15)  | 0.10 (0.051 to 0.20)      | 0.063 (0.04 to 0.099)  | 0.074 (0.043 to 0.13)     | 0.087 (0.048 to 0.16) | 0.14 (0.068 to 0.29)      | 0.14 (0.063 to 0.31) | 0.28 (0.11 to 0.76)       |
| 35                                                  | 0.097 (0.059 to 0.16)  | 0.12 (0.074 to 0.20)      | 0.093 (0.064 to 0.14)  | 0.11 (0.067 to 0.17)      | 0.12 (0.074 to 0.20)  | 0.19 (0.10 to 0.35)       | 0.19 (0.093 to 0.37) | 0.34 (0.15 to 0.79)       |
| 40                                                  | 0.12 (0.086 to 0.17)   | 0.15 (0.10 to 0.21)       | 0.14 (0.10 to 0.19)    | 0.16 (0.10 to 0.23)       | 0.17 (0.11 to 0.26)   | 0.25 (0.15 to 0.42)       | 0.25 (0.14 to 0.44)  | 0.41 (0.20 to 0.82)       |
| 45                                                  | 0.16 (0.12 to 0.21)    | 0.18 (0.14 to 0.24)       | 0.21 (0.16 to 0.27)    | 0.23 (0.16 to 0.31)       | 0.25 (0.18 to 0.35)   | 0.33 (0.22 to 0.50)       | 0.33 (0.21 to 0.51)  | 0.49 (0.28 to 0.86)       |
| 50                                                  | 0.22 (0.17 to 0.28)    | 0.25 (0.19 to 0.32)       | 0.31 (0.25 to 0.37)    | 0.33 (0.26 to 0.41)       | 0.35 (0.27 to 0.45)   | 0.43 (0.32 to 0.59)       | 0.43 (0.31 to 0.61)  | 0.58 (0.38 to 0.89)       |
| 55                                                  | 0.33 (0.27 to 0.41)    | 0.37 (0.30 to 0.45)       | 0.45 (0.40 to 0.52)    | 0.47 (0.41 to 0.56)       | 0.50 (0.42 to 0.59)   | 0.57 (0.46 to 0.71)       | 0.57 (0.45 to 0.72)  | 0.70 (0.53 to 0.93)       |
| 60                                                  | 0.57 (0.52 to 0.63)    | 0.60 (0.55 to 0.66)       | 0.67 (0.63 to 0.72)    | 0.69 (0.64 to 0.75)       | 0.71 (0.65 to 0.77)   | 0.76 (0.68 to 0.84)       | 0.76 (0.67 to 0.85)  | 0.84 (0.73 to 0.96)       |
| 65                                                  | 1.00 (1.00 to 1.00)    | 1.00 (1.00 to 1.00)       | 1.00 (1.00 to 1.00)    | 1.00 (1.00 to 1.00)       | 1.00 (1.00 to 1.00)   | 1.00 (1.00 to 1.00)       | 1.00 (1.00 to 1.00)  | 1.00 (1.00 to 1.00)       |
| 70                                                  | 1.69 (1.61 to 1.78)    | 1.53 (1.45 to 1.62)       | 1.48 (1.39 to 1.58)    | 1.45 (1.34 to 1.57)       | 1.42 (1.30 to 1.54)   | 1.32 (1.19 to 1.47)       | 1.32 (1.18 to 1.49)  | 1.20 (1.04 to 1.38)       |
| 75                                                  | 2.71 (2.42 to 3.03)    | 2.21 (1.96 to 2.48)       | 2.20 (1.94 to 2.50)    | 2.11 (1.80 to 2.46)       | 2.01 (1.70 to 2.38)   | 1.75 (1.42 to 2.16)       | 1.75 (1.39 to 2.21)  | 1.43 (1.08 to 1.90)       |
| 80                                                  | 4.08 (3.54 to 4.69)    | 3.07 (2.65 to 3.56)       | 3.27 (2.70 to 3.96)    | 3.06 (2.42 to 3.87)       | 2.85 (2.22 to 3.66)   | 2.31 (1.69 to 3.17)       | 2.32 (1.65 to 3.28)  | 1.71 (1.12 to 2.61)       |
| 85                                                  | 5.89 (5.15 to 6.73)    | 4.19 (3.63 to 4.84)       | 4.86 (3.76 to 6.27)    | 4.44 (3.25 to 6.07)       | 4.05 (2.90 to 5.65)   | 3.06 (2.01 to 4.65)       | 3.08 (1.94 to 4.87)  | 2.05 (1.17 to 3.60)       |
| 90                                                  | 8.37 (7.37 to 9.51)    | 5.69 (4.94 to 6.57)       | 7.21 (5.24 to 9.93)    | 6.44 (4.36 to 9.53)       | 5.74 (3.78 to 8.71)   | 4.04 (2.40 to 6.83)       | 4.07 (2.30 to 7.23)  | 2.45 (1.21 to 4.95)       |
| 95                                                  | 11.88 (10.33 to 13.67) | 7.73 (6.59 to 9.07)       | 10.70 (7.29 to 15.71)  | 9.35 (5.85 to 14.96)      | 8.14 (4.93 to 13.42)  | 5.35 (2.85 to 10.02)      | 5.39 (2.71 to 10.73) | 2.93 (1.26 to 6.82)       |

Table 16. Estimated hazard ratios for male sex: overall and stratified by age

| Transition                                                 | Overall             |                     |                              | Age: 70 or younger  |                     |                              | Over 70             |                     |                              |
|------------------------------------------------------------|---------------------|---------------------|------------------------------|---------------------|---------------------|------------------------------|---------------------|---------------------|------------------------------|
|                                                            | unadjusted          | adjusted age        | adjusted age and comorbidity | unadjusted          | adjusted age        | adjusted age and comorbidity | unadjusted          | adjusted age        | adjusted age and comorbidity |
| From general population to diagnosed with COVID-19         | 0.75 (0.74 to 0.76) | 0.75 (0.74 to 0.75) | 0.74 (0.73 to 0.75)          | 0.71 (0.70 to 0.72) | 0.72 (0.71 to 0.73) | 0.73 (0.72 to 0.74)          | 1.05 (1.01 to 1.09) | 1.11 (1.07 to 1.15) | 1.06 (1.02 to 1.11)          |
| From general population to hospitalised with COVID-19      | 1.37 (1.31 to 1.43) | 1.64 (1.57 to 1.72) | 1.55 (1.48 to 1.62)          | 1.37 (1.28 to 1.45) | 1.44 (1.35 to 1.53) | 1.38 (1.30 to 1.48)          | 1.79 (1.68 to 1.90) | 1.86 (1.75 to 1.98) | 1.72 (1.61 to 1.84)          |
| From diagnosed with COVID-19 to hospitalised with COVID-19 | 1.73 (1.66 to 1.80) | 1.77 (1.70 to 1.85) | 1.78 (1.70 to 1.86)          | 1.80 (1.71 to 1.89) | 1.85 (1.76 to 1.95) | 1.85 (1.76 to 1.95)          | 1.58 (1.46 to 1.70) | 1.53 (1.42 to 1.65) | 1.51 (1.39 to 1.64)          |
| From diagnosed with COVID-19 to death                      | 1.09 (1.01 to 1.18) | 1.33 (1.23 to 1.44) | 1.32 (1.22 to 1.44)          | 2.95 (2.23 to 3.90) | 3.04 (2.30 to 4.02) | 2.47 (1.87 to 3.26)          | 1.00 (0.92 to 1.09) | 1.25 (1.15 to 1.36) | 1.25 (1.15 to 1.37)          |
| From hospitalised with COVID-19 to death                   | 1.16 (1.07 to 1.25) | 1.31 (1.21 to 1.42) | 1.27 (1.17 to 1.38)          | 1.64 (1.36 to 1.99) | 1.61 (1.33 to 1.95) | 1.47 (1.21 to 1.79)          | 1.13 (1.04 to 1.24) | 1.25 (1.15 to 1.37) | 1.23 (1.13 to 1.35)          |

Table 17. Estimated hazard ratios for male sex: stratified by calendar month

|                                                            | March               |                     |                              | April               |                     |                              |
|------------------------------------------------------------|---------------------|---------------------|------------------------------|---------------------|---------------------|------------------------------|
| Transition                                                 | unadjusted          | adjusted age        | adjusted age and comorbidity | unadjusted          | adjusted age        | adjusted age and comorbidity |
| From general population to diagnosed with COVID-19         | 0.80 (0.79 to 0.81) | 0.79 (0.78 to 0.81) | 0.79 (0.78 to 0.81)          | 0.68 (0.66 to 0.69) | 0.68 (0.67 to 0.70) | 0.68 (0.66 to 0.69)          |
| From general population to hospitalised with COVID-19      | 1.47 (1.39 to 1.55) | 1.74 (1.65 to 1.84) | 1.65 (1.56 to 1.75)          | 1.20 (1.11 to 1.29) | 1.45 (1.34 to 1.57) | 1.36 (1.26 to 1.48)          |
| From diagnosed with COVID-19 to hospitalised with COVID-19 | 1.79 (1.70 to 1.87) | 1.79 (1.70 to 1.88) | 1.79 (1.70 to 1.88)          | 1.45 (1.34 to 1.58) | 1.55 (1.43 to 1.68) | 1.53 (1.41 to 1.67)          |
| From diagnosed with COVID-19 to death                      | 1.31 (1.17 to 1.48) | 1.45 (1.29 to 1.63) | 1.47 (1.30 to 1.67)          | 0.98 (0.88 to 1.09) | 1.28 (1.15 to 1.43) | 1.23 (1.10 to 1.38)          |
| From hospitalised with COVID-19 to death                   | 1.34 (1.22 to 1.47) | 1.49 (1.36 to 1.65) | 1.42 (1.29 to 1.58)          | 0.91 (0.79 to 1.04) | 1.04 (0.91 to 1.20) | 1.04 (0.90 to 1.20)          |

Table 18. Estimated hazard ratios for male sex: stratified by region

| Transition                                                 | Barcelona           |                     |                              | Girona              |                     |                              | Lleida              |                     |                              | Tarragona           |                     |                              |
|------------------------------------------------------------|---------------------|---------------------|------------------------------|---------------------|---------------------|------------------------------|---------------------|---------------------|------------------------------|---------------------|---------------------|------------------------------|
|                                                            | unadjusted          | adjusted age        | adjusted age and comorbidity | unadjusted          | adjusted age        | adjusted age and comorbidity | unadjusted          | adjusted age        | adjusted age and comorbidity | unadjusted          | adjusted age        | adjusted age and comorbidity |
| From general population to diagnosed with COVID-19         | 0.74 (0.73 to 0.75) | 0.74 (0.73 to 0.75) | 0.74 (0.73 to 0.75)          | 0.77 (0.74 to 0.81) | 0.77 (0.74 to 0.80) | 0.77 (0.74 to 0.80)          | 0.81 (0.77 to 0.85) | 0.79 (0.75 to 0.84) | 0.79 (0.75 to 0.83)          | 0.72 (0.68 to 0.77) | 0.72 (0.67 to 0.76) | 0.70 (0.65 to 0.74)          |
| From general population to hospitalised with COVID-19      | 1.37 (1.30 to 1.43) | 1.64 (1.56 to 1.72) | 1.55 (1.48 to 1.63)          | 1.44 (1.19 to 1.75) | 1.71 (1.41 to 2.08) | 1.65 (1.35 to 2.01)          | 1.75 (1.32 to 2.32) | 2.14 (1.61 to 2.85) | 2.04 (1.52 to 2.73)          | 1.60 (1.20 to 2.14) | 1.92 (1.44 to 2.57) | 1.74 (1.29 to 2.34)          |
| From diagnosed with COVID-19 to hospitalised with COVID-19 | 1.73 (1.66 to 1.81) | 1.77 (1.69 to 1.85) | 1.78 (1.70 to 1.86)          | 1.44 (1.24 to 1.68) | 1.52 (1.31 to 1.78) | 1.52 (1.30 to 1.78)          | 2.18 (1.78 to 2.68) | 2.35 (1.91 to 2.89) | 2.28 (1.85 to 2.81)          | 1.98 (1.50 to 2.61) | 1.98 (1.50 to 2.61) | 2.00 (1.51 to 2.64)          |
| From diagnosed with COVID-19 to death                      | 1.10 (1.01 to 1.20) | 1.36 (1.25 to 1.48) | 1.36 (1.24 to 1.49)          | 0.99 (0.76 to 1.30) | 1.26 (0.96 to 1.66) | 1.30 (0.97 to 1.74)          | 0.93 (0.64 to 1.36) | 1.03 (0.70 to 1.52) | 1.00 (0.65 to 1.54)          | 1.32 (0.88 to 1.99) | 1.37 (0.90 to 2.07) | 1.25 (0.81 to 1.93)          |
| From hospitalised with COVID-19 to death                   | 1.17 (1.08 to 1.27) | 1.34 (1.23 to 1.46) | 1.31 (1.20 to 1.43)          | 1.25 (0.91 to 1.72) | 1.33 (0.96 to 1.83) | 1.35 (0.96 to 1.89)          | 0.86 (0.57 to 1.31) | 0.91 (0.60 to 1.39) | 0.91 (0.58 to 1.42)          | 1.01 (0.55 to 1.84) | 1.01 (0.55 to 1.85) |                              |

Table 19. Estimated hazard ratios for comorbidities: overall and stratified by age

| Transition                                         | Variable               | Overall             |                          | Male- 70 or younger |                     | Female- 70 or younger |                     | Male- Over 70       |                     | Female- Over 70     |                     |
|----------------------------------------------------|------------------------|---------------------|--------------------------|---------------------|---------------------|-----------------------|---------------------|---------------------|---------------------|---------------------|---------------------|
|                                                    |                        | Unadjusted          | Adjusted for age and sex | Unadjusted          | Adjusted for age    | Unadjusted            | Adjusted for age    | Unadjusted          | Adjusted for age    | Unadjusted          | Adjusted for age    |
| From general population to diagnosed with COVID-19 | Charlson - 1:0         | 1.28 (1.26 to 1.31) | 1.28 (1.25 to 1.30)      | 1.30 (1.25 to 1.35) | 1.06 (1.03 to 1.11) | 1.40 (1.36 to 1.45)   | 1.19 (1.15 to 1.23) | 1.45 (1.32 to 1.59) | 1.40 (1.27 to 1.53) | 1.86 (1.73 to 2.01) | 1.74 (1.62 to 1.88) |
| From general population to diagnosed with COVID-19 | Charlson - 2:0         | 1.09 (1.07 to 1.12) | 1.13 (1.10 to 1.16)      | 1.23 (1.17 to 1.29) | 0.91 (0.87 to 0.96) | 1.20 (1.15 to 1.25)   | 0.91 (0.88 to 0.95) | 1.44 (1.33 to 1.57) | 1.35 (1.24 to 1.47) | 1.46 (1.36 to 1.56) | 1.34 (1.26 to 1.44) |
| From general population to diagnosed with COVID-19 | Charlson - 3+:0        | 1.27 (1.23 to 1.30) | 1.48 (1.44 to 1.53)      | 1.20 (1.13 to 1.28) | 0.87 (0.82 to 0.92) | 1.26 (1.17 to 1.34)   | 0.93 (0.86 to 0.99) | 1.96 (1.82 to 2.11) | 1.75 (1.62 to 1.89) | 2.28 (2.14 to 2.43) | 1.95 (1.83 to 2.08) |
| From general population to diagnosed with COVID-19 | Autoimmune condition   | 1.31 (1.28 to 1.34) | 1.17 (1.14 to 1.20)      | 1.35 (1.29 to 1.41) | 1.14 (1.09 to 1.20) | 1.33 (1.28 to 1.37)   | 1.17 (1.13 to 1.21) | 1.13 (1.03 to 1.24) | 1.11 (1.01 to 1.23) | 1.18 (1.10 to 1.27) | 1.17 (1.09 to 1.26) |
| From general population to diagnosed with COVID-19 | Chronic kidney disease | 1.08 (1.05 to 1.12) | 1.18 (1.14 to 1.22)      | 1.17 (1.07 to 1.28) | 0.85 (0.77 to 0.93) | 1.02 (0.92 to 1.12)   | 0.75 (0.68 to 0.82) | 1.30 (1.22 to 1.39) | 1.16 (1.08 to 1.23) | 1.35 (1.28 to 1.42) | 1.13 (1.07 to 1.20) |
| From general population to diagnosed with COVID-19 | COPD                   | 1.09 (1.05 to 1.14) | 1.20 (1.15 to 1.25)      | 1.07 (0.99 to 1.15) | 0.77 (0.71 to 0.83) | 1.18 (1.08 to 1.29)   | 0.87 (0.80 to 0.95) | 1.30 (1.21 to 1.40) | 1.28 (1.19 to 1.38) | 1.29 (1.15 to 1.44) | 1.27 (1.13 to 1.42) |
| From general population to diagnosed with COVID-19 | Dementia               | 2.62 (2.51 to 2.74) | 3.09 (2.94 to 3.24)      | NA                  | NA                  | NA                    | NA                  | 8.32 (7.81 to 8.87) | 2.90 (2.66 to 3.16) | 3.59 (3.37 to 3.82) | 3.08 (2.89 to 3.29) |
| From general population to diagnosed with COVID-19 | Heart disease          | 1.13 (1.11 to 1.15) | 1.23 (1.20 to 1.26)      | 1.24 (1.19 to 1.28) | 0.98 (0.94 to 1.01) | 1.32 (1.27 to 1.37)   | 1.05 (1.00 to 1.09) | 1.25 (1.18 to 1.32) | 1.15 (1.09 to 1.22) | 1.34 (1.27 to 1.40) | 1.19 (1.14 to 1.26) |
| From general population to diagnosed with COVID-19 | Hyperlipidemia         | 1.18 (1.16 to 1.21) | 1.11 (1.09 to 1.13)      | 1.37 (1.32 to 1.41) | 1.10 (1.06 to 1.13) | 1.24 (1.20 to 1.27)   | 0.94 (0.91 to 0.97) | 1.00 (0.93 to 1.07) | 1.06 (0.98 to 1.14) | 0.91 (0.86 to 0.97) | 0.97 (0.91 to 1.03) |
| From general population to diagnosed with COVID-19 | Hypertension           | 1.11 (1.10 to 1.14) | 1.10 (1.08 to 1.12)      | 1.31 (1.27 to 1.35) | 0.97 (0.94 to 1.00) | 1.23 (1.19 to 1.26)   | 0.91 (0.89 to 0.94) | 0.95 (0.89 to 1.00) | 0.97 (0.92 to 1.03) | 1.02 (0.97 to 1.08) | 1.02 (0.97 to 1.08) |



|                                                       |                        |                     |                     |                     |                     |                     |                     |                     |                     |                     |                     |
|-------------------------------------------------------|------------------------|---------------------|---------------------|---------------------|---------------------|---------------------|---------------------|---------------------|---------------------|---------------------|---------------------|
| From general population to diagnosed with COVID-19    | Malignant neoplasm     | 1.06 (1.03 to 1.09) | 1.06 (1.03 to 1.09) | 1.15 (1.08 to 1.22) | 0.85 (0.80 to 0.90) | 1.13 (1.08 to 1.18) | 0.87 (0.83 to 0.91) | 1.12 (1.06 to 1.20) | 1.08 (1.01 to 1.15) | 1.08 (1.01 to 1.15) | 1.05 (0.98 to 1.12) |
| From general population to diagnosed with COVID-19    | Obesity                | 1.29 (1.27 to 1.31) | 1.23 (1.21 to 1.25) | 1.36 (1.32 to 1.39) | 1.15 (1.11 to 1.18) | 1.41 (1.38 to 1.44) | 1.22 (1.19 to 1.25) | 0.99 (0.93 to 1.05) | 1.03 (0.97 to 1.09) | 1.05 (0.99 to 1.10) | 1.10 (1.04 to 1.15) |
| From general population to diagnosed with COVID-19    | Type 2 diabetes        | 1.04 (1.02 to 1.07) | 1.08 (1.05 to 1.11) | 1.18 (1.13 to 1.24) | 0.85 (0.82 to 0.90) | 1.17 (1.11 to 1.23) | 0.86 (0.82 to 0.90) | 1.09 (1.02 to 1.16) | 1.12 (1.05 to 1.19) | 1.08 (1.01 to 1.15) | 1.08 (1.01 to 1.15) |
| From general population to hospitalised with COVID-19 | Charlson - 1:0         | 3.27 (3.06 to 3.51) | 1.45 (1.35 to 1.56) | 2.59 (2.28 to 2.94) | 1.28 (1.12 to 1.45) | 2.18 (1.85 to 2.57) | 1.35 (1.15 to 1.60) | 1.53 (1.33 to 1.76) | 1.50 (1.30 to 1.73) | 1.58 (1.36 to 1.83) | 1.51 (1.30 to 1.76) |
| From general population to hospitalised with COVID-19 | Charlson - 2:0         | 4.97 (4.67 to 5.29) | 1.63 (1.53 to 1.74) | 4.32 (3.79 to 4.91) | 1.57 (1.37 to 1.79) | 3.97 (3.44 to 4.57) | 1.84 (1.59 to 2.13) | 1.54 (1.36 to 1.75) | 1.49 (1.31 to 1.69) | 1.61 (1.41 to 1.83) | 1.53 (1.34 to 1.75) |
| From general population to hospitalised with COVID-19 | Charlson - 3+:0        | 9.25 (8.75 to 9.77) | 2.33 (2.18 to 2.48) | 6.27 (5.49 to 7.16) | 2.08 (1.81 to 2.39) | 7.12 (5.92 to 8.56) | 2.98 (2.46 to 3.60) | 2.25 (2.02 to 2.51) | 2.11 (1.89 to 2.36) | 2.55 (2.27 to 2.87) | 2.32 (2.05 to 2.62) |
| From general population to hospitalised with COVID-19 | Autoimmune condition   | 2.17 (2.02 to 2.34) | 1.33 (1.24 to 1.43) | 2.11 (1.81 to 2.46) | 1.34 (1.15 to 1.57) | 2.27 (1.93 to 2.66) | 1.56 (1.33 to 1.83) | 1.26 (1.10 to 1.45) | 1.26 (1.10 to 1.44) | 1.28 (1.11 to 1.47) | 1.27 (1.10 to 1.45) |
| From general population to hospitalised with COVID-19 | Chronic kidney disease | 5.70 (5.38 to 6.04) | 1.51 (1.41 to 1.60) | 5.99 (5.06 to 7.09) | 2.03 (1.71 to 2.41) | 6.01 (4.78 to 7.56) | 2.39 (1.90 to 3.02) | 1.44 (1.31 to 1.57) | 1.33 (1.21 to 1.46) | 1.64 (1.48 to 1.81) | 1.46 (1.31 to 1.62) |
| From general population to hospitalised with COVID-19 | COPD                   | 4.69 (4.35 to 5.06) | 1.50 (1.39 to 1.63) | 4.03 (3.41 to 4.77) | 1.36 (1.14 to 1.61) | 3.49 (2.61 to 4.67) | 1.57 (1.18 to 2.09) | 1.46 (1.32 to 1.62) | 1.44 (1.30 to 1.60) | 1.56 (1.28 to 1.90) | 1.54 (1.26 to 1.88) |
| From general population to hospitalised with COVID-19 | Dementia               | 7.53 (6.83 to 8.30) | 1.86 (1.68 to 2.06) | NA                  | NA                  | NA                  | NA                  | 1.94 (1.66 to 2.26) | 1.74 (1.49 to 2.03) | 2.32 (2.02 to 2.66) | 2.02 (1.76 to 2.33) |
| From general population to hospitalised with COVID-19 | Heart disease          | 4.58 (4.37 to 4.80) | 1.43 (1.36 to 1.51) | 3.30 (2.97 to 3.66) | 1.37 (1.23 to 1.53) | 3.09 (2.65 to 3.59) | 1.58 (1.35 to 1.85) | 1.42 (1.31 to 1.54) | 1.35 (1.24 to 1.46) | 1.53 (1.40 to 1.68) | 1.42 (1.29 to 1.56) |
| From general population to hospitalised with COVID-19 | Hyperlipidemia         | 2.26 (2.14 to 2.39) | 1.17 (1.10 to 1.24) | 2.79 (2.52 to 3.09) | 1.34 (1.21 to 1.48) | 2.68 (2.36 to 3.04) | 1.24 (1.09 to 1.41) | 1.10 (0.99 to 1.22) | 1.15 (1.03 to 1.27) | 0.90 (0.80 to 1.02) | 0.95 (0.84 to 1.07) |

|                                                            |                        |                     |                     |                     |                     |                     |                     |                     |                     |                     |                     |
|------------------------------------------------------------|------------------------|---------------------|---------------------|---------------------|---------------------|---------------------|---------------------|---------------------|---------------------|---------------------|---------------------|
| From general population to hospitalised with COVID-19      | Hypertension           | 3.04 (2.90 to 3.19) | 1.11 (1.06 to 1.17) | 3.22 (2.94 to 3.53) | 1.16 (1.06 to 1.28) | 3.43 (3.06 to 3.85) | 1.50 (1.33 to 1.69) | 0.96 (0.88 to 1.04) | 0.98 (0.90 to 1.06) | 0.98 (0.89 to 1.08) | 0.98 (0.89 to 1.08) |
| From general population to hospitalised with COVID-19      | Malignant neoplasm     | 3.64 (3.43 to 3.86) | 1.24 (1.17 to 1.32) | 3.70 (3.22 to 4.26) | 1.33 (1.16 to 1.54) | 3.05 (2.60 to 3.58) | 1.46 (1.24 to 1.72) | 1.15 (1.05 to 1.26) | 1.11 (1.01 to 1.22) | 1.20 (1.07 to 1.36) | 1.18 (1.04 to 1.33) |
| From general population to hospitalised with COVID-19      | Obesity                | 3.36 (3.21 to 3.51) | 1.78 (1.70 to 1.87) | 3.61 (3.31 to 3.93) | 1.88 (1.72 to 2.06) | 4.21 (3.82 to 4.64) | 2.69 (2.43 to 2.97) | 1.31 (1.20 to 1.42) | 1.35 (1.24 to 1.47) | 1.55 (1.41 to 1.70) | 1.61 (1.47 to 1.77) |
| From general population to hospitalised with COVID-19      | Type 2 diabetes        | 4.29 (4.06 to 4.53) | 1.54 (1.46 to 1.63) | 4.47 (4.02 to 4.98) | 1.62 (1.45 to 1.81) | 5.55 (4.82 to 6.39) | 2.41 (2.09 to 2.79) | 1.28 (1.16 to 1.40) | 1.30 (1.19 to 1.42) | 1.38 (1.23 to 1.55) | 1.38 (1.24 to 1.55) |
| From diagnosed with COVID-19 to hospitalised with COVID-19 | Charlson - 1:0         | 1.78 (1.66 to 1.90) | 1.03 (0.96 to 1.11) | 1.54 (1.38 to 1.72) | 0.99 (0.89 to 1.11) | 1.43 (1.25 to 1.62) | 1.10 (0.97 to 1.26) | 0.94 (0.79 to 1.12) | 0.99 (0.83 to 1.18) | 0.86 (0.72 to 1.01) | 0.95 (0.80 to 1.13) |
| From diagnosed with COVID-19 to hospitalised with COVID-19 | Charlson - 2:0         | 2.72 (2.56 to 2.90) | 1.19 (1.11 to 1.27) | 2.45 (2.18 to 2.76) | 1.15 (1.01 to 1.30) | 1.86 (1.62 to 2.13) | 1.13 (0.98 to 1.30) | 1.13 (0.97 to 1.32) | 1.17 (1.01 to 1.37) | 0.99 (0.85 to 1.15) | 1.07 (0.92 to 1.25) |
| From diagnosed with COVID-19 to hospitalised with COVID-19 | Charlson - 3+:0        | 3.68 (3.46 to 3.91) | 1.20 (1.12 to 1.30) | 2.52 (2.18 to 2.92) | 1.07 (0.92 to 1.25) | 3.23 (2.69 to 3.88) | 1.71 (1.41 to 2.06) | 1.01 (0.88 to 1.16) | 1.10 (0.96 to 1.27) | 0.98 (0.85 to 1.12) | 1.17 (1.01 to 1.36) |
| From diagnosed with COVID-19 to hospitalised with COVID-19 | Autoimmune condition   | 1.40 (1.30 to 1.51) | 1.07 (1.00 to 1.16) | 1.51 (1.32 to 1.72) | 1.19 (1.05 to 1.36) | 1.23 (1.06 to 1.42) | 1.00 (0.87 to 1.16) | 0.91 (0.76 to 1.10) | 0.90 (0.75 to 1.09) | 1.12 (0.95 to 1.31) | 1.10 (0.93 to 1.29) |
| From diagnosed with COVID-19 to hospitalised with COVID-19 | Chronic kidney disease | 3.18 (2.97 to 3.41) | 1.18 (1.09 to 1.27) | 3.01 (2.49 to 3.63) | 1.30 (1.08 to 1.57) | 3.52 (2.77 to 4.48) | 1.87 (1.47 to 2.39) | 1.05 (0.93 to 1.18) | 1.11 (0.98 to 1.25) | 0.96 (0.84 to 1.08) | 1.09 (0.96 to 1.24) |
| From diagnosed with COVID-19 to hospitalised with COVID-19 | COPD                   | 2.62 (2.39 to 2.88) | 0.98 (0.89 to 1.08) | 2.04 (1.69 to 2.47) | 0.90 (0.75 to 1.09) | 1.42 (1.02 to 1.99) | 0.76 (0.54 to 1.07) | 1.00 (0.87 to 1.14) | 1.01 (0.88 to 1.15) | 1.14 (0.89 to 1.46) | 1.14 (0.89 to 1.45) |
| From diagnosed with COVID-19 to hospitalised with COVID-19 | Dementia               | 1.98 (1.77 to 2.23) | 0.66 (0.58 to 0.75) | NA                  | NA                  | NA                  | NA                  | 0.53 (0.44 to 0.65) | 0.57 (0.46 to 0.69) | 0.66 (0.56 to 0.78) | 0.77 (0.65 to 0.91) |
| From diagnosed with COVID-19 to hospitalised with COVID-19 | Heart disease          | 2.51 (2.39 to 2.64) | 1.07 (1.01 to 1.13) | 1.80 (1.62 to 1.99) | 0.98 (0.88 to 1.09) | 1.64 (1.43 to 1.89) | 1.06 (0.92 to 1.23) | 1.03 (0.93 to 1.15) | 1.08 (0.97 to 1.20) | 1.02 (0.91 to 1.14) | 1.09 (0.97 to 1.22) |

|                                                            |                        |                        |                     |                        |                     |                         |                        |                     |                     |                     |                     |
|------------------------------------------------------------|------------------------|------------------------|---------------------|------------------------|---------------------|-------------------------|------------------------|---------------------|---------------------|---------------------|---------------------|
| From diagnosed with COVID-19 to hospitalised with COVID-19 | Hyperlipidemia         | 1.79 (1.69 to 1.89)    | 1.10 (1.04 to 1.16) | 1.74 (1.59 to 1.90)    | 1.12 (1.02 to 1.22) | 1.90 (1.71 to 2.11)     | 1.15 (1.04 to 1.29)    | 1.11 (0.97 to 1.27) | 1.07 (0.93 to 1.22) | 1.05 (0.91 to 1.21) | 1.00 (0.87 to 1.15) |
| From diagnosed with COVID-19 to hospitalised with COVID-19 | Hypertension           | 2.24 (2.14 to 2.36)    | 1.08 (1.02 to 1.13) | 2.14 (1.97 to 2.31)    | 1.07 (0.99 to 1.17) | 2.18 (1.98 to 2.41)     | 1.30 (1.18 to 1.44)    | 0.93 (0.84 to 1.04) | 0.92 (0.82 to 1.02) | 0.98 (0.87 to 1.10) | 0.99 (0.88 to 1.11) |
| From diagnosed with COVID-19 to hospitalised with COVID-19 | Malignant neoplasm     | 2.32 (2.18 to 2.48)    | 1.05 (0.98 to 1.13) | 2.04 (1.77 to 2.36)    | 0.94 (0.81 to 1.09) | 1.85 (1.59 to 2.15)     | 1.16 (1.00 to 1.35)    | 1.00 (0.89 to 1.12) | 1.01 (0.90 to 1.14) | 1.06 (0.91 to 1.23) | 1.07 (0.92 to 1.23) |
| From diagnosed with COVID-19 to hospitalised with COVID-19 | Obesity                | 2.21 (2.12 to 2.31)    | 1.57 (1.50 to 1.64) | 2.20 (2.05 to 2.37)    | 1.43 (1.33 to 1.55) | 2.53 (2.35 to 2.74)     | 2.11 (1.95 to 2.28)    | 1.19 (1.07 to 1.33) | 1.15 (1.03 to 1.29) | 1.36 (1.22 to 1.52) | 1.30 (1.16 to 1.45) |
| From diagnosed with COVID-19 to hospitalised with COVID-19 | Type 2 diabetes        | 3.02 (2.85 to 3.20)    | 1.34 (1.26 to 1.42) | 2.72 (2.46 to 3.01)    | 1.31 (1.18 to 1.46) | 3.23 (2.83 to 3.68)     | 1.88 (1.64 to 2.15)    | 1.10 (0.98 to 1.24) | 1.09 (0.97 to 1.23) | 1.21 (1.06 to 1.39) | 1.21 (1.05 to 1.38) |
| From diagnosed with COVID-19 to death                      | Charlson - 1:0         | 13.80 (12.07 to 15.78) | 2.45 (2.13 to 2.81) | 4.04 (2.48 to 6.59)    | 1.79 (1.09 to 2.94) | 8.72 (4.23 to 17.95)    | 5.42 (2.62 to 11.22)   | 2.14 (1.68 to 2.71) | 1.75 (1.38 to 2.23) | 3.76 (3.12 to 4.53) | 2.58 (2.14 to 3.11) |
| From diagnosed with COVID-19 to death                      | Charlson - 2:0         | 17.11 (14.92 to 19.63) | 1.68 (1.46 to 1.94) | 10.27 (6.55 to 16.10)  | 2.65 (1.66 to 4.22) | 15.09 (7.53 to 30.22)   | 6.12 (3.01 to 12.44)   | 1.43 (1.12 to 1.81) | 1.26 (0.99 to 1.60) | 2.24 (1.85 to 2.72) | 1.56 (1.28 to 1.89) |
| From diagnosed with COVID-19 to death                      | Charlson - 3+:0        | 64.94 (57.77 to 73.00) | 2.59 (2.28 to 2.94) | 26.63 (17.92 to 39.56) | 5.50 (3.60 to 8.41) | 98.99 (54.16 to 180.92) | 31.22 (16.55 to 58.89) | 2.90 (2.38 to 3.54) | 2.03 (1.66 to 2.48) | 4.45 (3.75 to 5.27) | 2.38 (2.00 to 2.83) |
| From diagnosed with COVID-19 to death                      | Autoimmune condition   | 1.90 (1.68 to 2.16)    | 1.12 (0.99 to 1.27) | 3.29 (2.08 to 5.22)    | 2.32 (1.47 to 3.69) | 2.20 (1.10 to 4.42)     | 1.43 (0.71 to 2.87)    | 1.01 (0.81 to 1.25) | 1.10 (0.89 to 1.37) | 0.93 (0.79 to 1.10) | 1.05 (0.89 to 1.24) |
| From diagnosed with COVID-19 to death                      | Chronic kidney disease | 18.46 (17.01 to 20.03) | 1.24 (1.14 to 1.35) | 13.21 (8.08 to 21.62)  | 2.65 (1.60 to 4.39) | 35.79 (19.97 to 64.13)  | 9.62 (5.26 to 17.60)   | 1.70 (1.49 to 1.94) | 1.33 (1.16 to 1.52) | 1.78 (1.60 to 1.99) | 1.12 (1.00 to 1.25) |
| From diagnosed with COVID-19 to death                      | COPD                   | 6.01 (5.29 to 6.83)    | 1.07 (0.94 to 1.22) | 6.53 (3.77 to 11.30)   | 1.43 (0.82 to 2.50) | 14.66 (7.03 to 30.56)   | 4.90 (2.34 to 10.27)   | 1.09 (0.93 to 1.28) | 1.07 (0.91 to 1.26) | 0.98 (0.76 to 1.27) | 1.02 (0.79 to 1.31) |
| From diagnosed with COVID-19 to death                      | Dementia               | 53.84 (49.64 to 58.38) | 2.84 (2.60 to 3.09) | NA                     | NA                  | NA                      | NA                     | 4.23 (3.70 to 4.85) | 2.78 (2.41 to 3.20) | 4.93 (4.43 to 5.49) | 2.80 (2.51 to 3.13) |
| From diagnosed with COVID-19 to death                      | Heart disease          | 8.47 (7.83 to 9.15)    | 0.96 (0.88 to 1.03) | 5.82 (4.13 to 8.20)    | 1.83 (1.28 to 2.60) | 5.50 (3.16 to 9.58)     | 2.08 (1.18 to 3.66)    | 1.19 (1.05 to 1.35) | 0.95 (0.84 to 1.08) | 1.14 (1.03 to 1.27) | 0.93 (0.84 to 1.04) |
| From diagnosed with COVID-19 to death                      | Hyperlipidemia         | 1.56 (1.40 to 1.74)    | 1.01 (0.91 to 1.13) | 1.52 (0.98 to 2.37)    | 0.75 (0.48 to 1.17) | 3.56 (2.09 to 6.06)     | 1.28 (0.75 to 2.20)    | 0.73 (0.61 to 0.88) | 1.00 (0.83 to 1.21) | 0.81 (0.70 to 0.94) | 1.02 (0.88 to 1.18) |
| From diagnosed with COVID-19 to death                      | Hypertension           | 3.81 (3.52 to 4.14)    | 1.01 (0.93 to 1.10) | 2.77 (1.94 to 3.97)    | 0.79 (0.55 to 1.14) | 4.35 (2.64 to 7.17)     | 1.51 (0.91 to 2.51)    | 0.94 (0.82 to 1.07) | 1.01 (0.88 to 1.15) | 1.05 (0.94 to 1.17) | 1.00 (0.90 to 1.12) |

|                                          |                        |                     |                     |                      |                     |                        |                      |                     |                     |                     |                     |
|------------------------------------------|------------------------|---------------------|---------------------|----------------------|---------------------|------------------------|----------------------|---------------------|---------------------|---------------------|---------------------|
| From diagnosed with COVID-19 to death    | Malignant neoplasm     | 5.89 (5.37 to 6.45) | 1.13 (1.03 to 1.24) | 8.34 (5.56 to 12.51) | 1.91 (1.26 to 2.90) | 16.70 (10.45 to 26.68) | 6.89 (4.27 to 11.11) | 1.10 (0.95 to 1.26) | 1.03 (0.90 to 1.19) | 1.14 (0.99 to 1.31) | 1.10 (0.96 to 1.26) |
| From diagnosed with COVID-19 to death    | Obesity                | 1.58 (1.45 to 1.73) | 0.90 (0.83 to 0.99) | 2.53 (1.79 to 3.57)  | 1.12 (0.79 to 1.59) | 2.83 (1.77 to 4.52)    | 1.82 (1.14 to 2.92)  | 0.69 (0.59 to 0.80) | 0.88 (0.76 to 1.03) | 0.63 (0.56 to 0.71) | 0.86 (0.77 to 0.97) |
| From diagnosed with COVID-19 to death    | Type 2 diabetes        | 5.88 (5.36 to 6.44) | 1.42 (1.29 to 1.56) | 8.42 (5.91 to 12.00) | 2.25 (1.57 to 3.24) | 12.24 (7.26 to 20.65)  | 4.13 (2.42 to 7.05)  | 1.17 (1.01 to 1.36) | 1.28 (1.11 to 1.48) | 1.29 (1.13 to 1.47) | 1.42 (1.24 to 1.61) |
| From hospitalised with COVID-19 to death | Charlson - 1:0         | 3.42 (3.01 to 3.87) | 1.67 (1.47 to 1.90) | 2.94 (2.19 to 3.94)  | 2.00 (1.48 to 2.71) | 2.11 (1.27 to 3.51)    | 1.68 (1.01 to 2.79)  | 1.57 (1.29 to 1.92) | 1.43 (1.17 to 1.75) | 1.90 (1.53 to 2.35) | 1.57 (1.26 to 1.95) |
| From hospitalised with COVID-19 to death | Charlson - 2:0         | 3.61 (3.22 to 4.06) | 1.46 (1.29 to 1.64) | 2.77 (2.03 to 3.77)  | 1.72 (1.25 to 2.37) | 2.71 (1.74 to 4.24)    | 1.87 (1.19 to 2.94)  | 1.49 (1.24 to 1.80) | 1.33 (1.10 to 1.60) | 1.57 (1.28 to 1.92) | 1.22 (1.00 to 1.50) |
| From hospitalised with COVID-19 to death | Charlson - 3+:0        | 6.46 (5.84 to 7.14) | 1.83 (1.64 to 2.05) | 5.48 (4.15 to 7.24)  | 3.22 (2.41 to 4.31) | 7.74 (5.21 to 11.48)   | 4.83 (3.22 to 7.24)  | 1.88 (1.60 to 2.21) | 1.49 (1.26 to 1.76) | 2.44 (2.05 to 2.91) | 1.63 (1.36 to 1.96) |
| From hospitalised with COVID-19 to death | Autoimmune condition   | 1.42 (1.27 to 1.60) | 1.19 (1.06 to 1.34) | 1.86 (1.34 to 2.57)  | 1.56 (1.13 to 2.16) | 1.39 (0.84 to 2.30)    | 1.15 (0.69 to 1.90)  | 1.06 (0.88 to 1.27) | 1.08 (0.90 to 1.30) | 1.20 (1.00 to 1.44) | 1.20 (1.00 to 1.44) |
| From hospitalised with COVID-19 to death | Chronic kidney disease | 3.24 (2.98 to 3.51) | 1.25 (1.15 to 1.36) | 3.50 (2.56 to 4.79)  | 2.20 (1.60 to 3.03) | 4.88 (3.10 to 7.66)    | 2.96 (1.87 to 4.69)  | 1.40 (1.25 to 1.58) | 1.19 (1.05 to 1.34) | 1.58 (1.38 to 1.81) | 1.14 (1.00 to 1.31) |
| From hospitalised with COVID-19 to death | COPD                   | 2.21 (1.98 to 2.47) | 1.14 (1.02 to 1.28) | 3.68 (2.69 to 5.02)  | 2.07 (1.51 to 2.84) | 4.14 (2.24 to 7.65)    | 2.66 (1.44 to 4.93)  | 1.08 (0.94 to 1.23) | 1.05 (0.92 to 1.21) | 1.18 (0.90 to 1.55) | 1.04 (0.79 to 1.37) |
| From hospitalised with COVID-19 to death | Dementia               | 5.48 (4.91 to 6.12) | 1.98 (1.77 to 2.22) | NA                   | NA                  | NA                     | NA                   | 2.06 (1.74 to 2.45) | 1.64 (1.38 to 1.96) | 2.94 (2.52 to 3.43) | 2.12 (1.81 to 2.48) |
| From hospitalised with COVID-19 to death | Heart disease          | 2.98 (2.77 to 3.22) | 1.22 (1.13 to 1.32) | 2.81 (2.24 to 3.53)  | 1.79 (1.42 to 2.27) | 3.34 (2.31 to 4.82)    | 2.13 (1.47 to 3.11)  | 1.22 (1.09 to 1.36) | 1.08 (0.97 to 1.21) | 1.50 (1.32 to 1.71) | 1.19 (1.05 to 1.36) |
| From hospitalised with COVID-19 to death | Hyperlipidemia         | 1.05 (0.95 to 1.16) | 1.04 (0.94 to 1.14) | 1.16 (0.89 to 1.51)  | 0.98 (0.75 to 1.27) | 1.14 (0.76 to 1.72)    | 0.76 (0.50 to 1.15)  | 1.00 (0.87 to 1.15) | 1.09 (0.95 to 1.25) | 0.94 (0.79 to 1.11) | 1.06 (0.89 to 1.25) |
| From hospitalised with COVID-19 to death | Hypertension           | 1.43 (1.32 to 1.55) | 1.04 (0.96 to 1.13) | 1.52 (1.21 to 1.90)  | 1.06 (0.84 to 1.33) | 1.83 (1.30 to 2.57)    | 1.20 (0.85 to 1.69)  | 0.99 (0.88 to 1.11) | 1.01 (0.90 to 1.14) | 1.04 (0.90 to 1.19) | 1.05 (0.92 to 1.21) |
| From hospitalised with COVID-19 to death | Malignant neoplasm     | 2.24 (2.05 to 2.44) | 1.21 (1.11 to 1.33) | 2.93 (2.22 to 3.86)  | 1.80 (1.36 to 2.38) | 2.05 (1.32 to 3.17)    | 1.47 (0.95 to 2.28)  | 1.27 (1.13 to 1.43) | 1.18 (1.05 to 1.33) | 1.23 (1.05 to 1.45) | 1.13 (0.96 to 1.33) |
| From hospitalised with COVID-19 to death | Obesity                | 1.12 (1.04 to 1.21) | 1.09 (1.01 to 1.18) | 2.06 (1.67 to 2.55)  | 1.61 (1.30 to 2.00) | 1.55 (1.13 to 2.13)    | 1.37 (1.00 to 1.88)  | 0.90 (0.80 to 1.01) | 1.02 (0.91 to 1.15) | 0.84 (0.74 to 0.96) | 0.98 (0.85 to 1.11) |
| From hospitalised with COVID-19 to death | Type 2 diabetes        | 1.81 (1.66 to 1.97) | 1.26 (1.15 to 1.37) | 1.70 (1.31 to 2.20)  | 1.18 (0.91 to 1.53) | 3.54 (2.50 to 5.02)    | 2.52 (1.77 to 3.58)  | 1.12 (0.99 to 1.26) | 1.15 (1.02 to 1.30) | 1.26 (1.09 to 1.47) | 1.32 (1.13 to 1.53) |

Table 20. Estimated hazard ratios for comorbidities: stratified by calendar month

| Transition                                            | Variable               | March               |                          | April                  |                          |
|-------------------------------------------------------|------------------------|---------------------|--------------------------|------------------------|--------------------------|
|                                                       |                        | Unadjusted          | Adjusted for age and sex | Unadjusted             | Adjusted for age and sex |
| From general population to diagnosed with COVID-19    | Charlson - 1:0         | 1.25 (1.21 to 1.29) | 1.22 (1.19 to 1.26)      | 1.33 (1.28 to 1.37)    | 1.34 (1.29 to 1.39)      |
| From general population to diagnosed with COVID-19    | Charlson - 2:0         | 1.08 (1.05 to 1.12) | 1.13 (1.09 to 1.17)      | 1.11 (1.06 to 1.15)    | 1.13 (1.09 to 1.18)      |
| From general population to diagnosed with COVID-19    | Charlson - 3+:0        | 1.06 (1.02 to 1.10) | 1.32 (1.26 to 1.37)      | 1.56 (1.50 to 1.62)    | 1.69 (1.62 to 1.77)      |
| From general population to diagnosed with COVID-19    | Autoimmune condition   | 1.28 (1.24 to 1.32) | 1.17 (1.13 to 1.21)      | 1.30 (1.25 to 1.35)    | 1.16 (1.11 to 1.20)      |
| From general population to diagnosed with COVID-19    | Chronic kidney disease | 0.94 (0.90 to 0.99) | 1.18 (1.13 to 1.24)      | 1.32 (1.26 to 1.38)    | 1.18 (1.12 to 1.24)      |
| From general population to diagnosed with COVID-19    | COPD                   | 0.97 (0.92 to 1.03) | 1.07 (1.01 to 1.14)      | 1.23 (1.16 to 1.31)    | 1.32 (1.24 to 1.41)      |
| From general population to diagnosed with COVID-19    | Dementia               | 1.63 (1.51 to 1.75) | 2.07 (1.91 to 2.25)      | 4.33 (4.09 to 4.57)    | 4.26 (4.00 to 4.54)      |
| From general population to diagnosed with COVID-19    | Heart disease          | 1.07 (1.04 to 1.10) | 1.23 (1.19 to 1.26)      | 1.21 (1.17 to 1.25)    | 1.24 (1.19 to 1.28)      |
| From general population to diagnosed with COVID-19    | Hyperlipidemia         | 1.20 (1.17 to 1.23) | 1.09 (1.06 to 1.12)      | 1.17 (1.13 to 1.20)    | 1.14 (1.10 to 1.18)      |
| From general population to diagnosed with COVID-19    | Hypertension           | 1.12 (1.09 to 1.14) | 1.09 (1.06 to 1.11)      | 1.13 (1.10 to 1.16)    | 1.12 (1.09 to 1.15)      |
| From general population to diagnosed with COVID-19    | Malignant neoplasm     | 1.04 (1.00 to 1.08) | 1.07 (1.03 to 1.11)      | 1.11 (1.07 to 1.16)    | 1.07 (1.02 to 1.11)      |
| From general population to diagnosed with COVID-19    | Obesity                | 1.29 (1.26 to 1.31) | 1.22 (1.20 to 1.25)      | 1.29 (1.26 to 1.33)    | 1.24 (1.21 to 1.27)      |
| From general population to diagnosed with COVID-19    | Type 2 diabetes        | 1.00 (0.97 to 1.04) | 1.03 (1.00 to 1.07)      | 1.11 (1.07 to 1.16)    | 1.14 (1.09 to 1.18)      |
| From general population to hospitalised with COVID-19 | Charlson - 1:0         | 3.25 (2.99 to 3.53) | 1.40 (1.29 to 1.53)      | 3.34 (2.95 to 3.78)    | 1.56 (1.37 to 1.77)      |
| From general population to hospitalised with COVID-19 | Charlson - 2:0         | 4.85 (4.50 to 5.23) | 1.55 (1.43 to 1.68)      | 5.27 (4.72 to 5.88)    | 1.80 (1.60 to 2.03)      |
| From general population to hospitalised with COVID-19 | Charlson - 3+:0        | 8.56 (8.00 to 9.16) | 2.12 (1.96 to 2.30)      | 10.60 (9.63 to 11.66)  | 2.75 (2.46 to 3.09)      |
| From general population to hospitalised with COVID-19 | Autoimmune condition   | 2.12 (1.94 to 2.32) | 1.30 (1.19 to 1.43)      | 2.32 (2.04 to 2.63)    | 1.42 (1.25 to 1.61)      |
| From general population to hospitalised with COVID-19 | Chronic kidney disease | 5.29 (4.92 to 5.68) | 1.43 (1.32 to 1.55)      | 6.47 (5.87 to 7.14)    | 1.64 (1.47 to 1.83)      |
| From general population to hospitalised with COVID-19 | COPD                   | 4.78 (4.36 to 5.24) | 1.50 (1.36 to 1.64)      | 4.50 (3.92 to 5.15)    | 1.51 (1.31 to 1.73)      |
| From general population to hospitalised with COVID-19 | Dementia               | 5.20 (4.52 to 5.98) | 1.33 (1.15 to 1.54)      | 12.46 (10.83 to 14.33) | 2.93 (2.52 to 3.40)      |
| From general population to hospitalised with COVID-19 | Heart disease          | 4.43 (4.19 to 4.69) | 1.38 (1.30 to 1.48)      | 4.85 (4.47 to 5.27)    | 1.51 (1.38 to 1.65)      |
| From general population to hospitalised with COVID-19 | Hyperlipidemia         | 2.41 (2.26 to 2.58) | 1.22 (1.14 to 1.30)      | 1.97 (1.77 to 2.18)    | 1.05 (0.94 to 1.17)      |
| From general population to hospitalised with COVID-19 | Hypertension           | 3.19 (3.01 to 3.38) | 1.15 (1.08 to 1.22)      | 2.76 (2.54 to 3.01)    | 1.03 (0.94 to 1.13)      |
| From general population to hospitalised with COVID-19 | Malignant neoplasm     | 3.70 (3.44 to 3.97) | 1.26 (1.17 to 1.36)      | 3.46 (3.11 to 3.85)    | 1.19 (1.07 to 1.33)      |
| From general population to hospitalised with COVID-19 | Obesity                | 3.58 (3.39 to 3.78) | 1.88 (1.78 to 1.99)      | 2.95 (2.72 to 3.20)    | 1.59 (1.46 to 1.72)      |
| From general population to hospitalised with COVID-19 | Type 2 diabetes        | 4.26 (3.99 to 4.55) | 1.50 (1.40 to 1.61)      | 4.44 (4.03 to 4.88)    | 1.65 (1.50 to 1.82)      |

|                                                            |                        |                        |                     |                        |                     |
|------------------------------------------------------------|------------------------|------------------------|---------------------|------------------------|---------------------|
| From diagnosed with COVID-19 to hospitalised with COVID-19 | Charlson - 1:0         | 1.76 (1.63 to 1.90)    | 1.05 (0.97 to 1.14) | 1.89 (1.66 to 2.15)    | 1.08 (0.94 to 1.23) |
| From diagnosed with COVID-19 to hospitalised with COVID-19 | Charlson - 2:0         | 2.75 (2.55 to 2.96)    | 1.20 (1.10 to 1.29) | 2.74 (2.42 to 3.11)    | 1.22 (1.06 to 1.40) |
| From diagnosed with COVID-19 to hospitalised with COVID-19 | Charlson - 3+:0        | 4.06 (3.77 to 4.37)    | 1.28 (1.17 to 1.39) | 3.74 (3.35 to 4.18)    | 1.25 (1.09 to 1.43) |
| From diagnosed with COVID-19 to hospitalised with COVID-19 | Autoimmune condition   | 1.41 (1.29 to 1.54)    | 1.10 (1.01 to 1.21) | 1.37 (1.18 to 1.60)    | 1.03 (0.88 to 1.19) |
| From diagnosed with COVID-19 to hospitalised with COVID-19 | Chronic kidney disease | 3.61 (3.32 to 3.92)    | 1.23 (1.12 to 1.35) | 2.94 (2.58 to 3.34)    | 1.07 (0.93 to 1.24) |
| From diagnosed with COVID-19 to hospitalised with COVID-19 | COPD                   | 2.77 (2.48 to 3.10)    | 0.98 (0.87 to 1.10) | 2.70 (2.28 to 3.20)    | 1.11 (0.93 to 1.32) |
| From diagnosed with COVID-19 to hospitalised with COVID-19 | Dementia               | 2.11 (1.79 to 2.50)    | 0.61 (0.51 to 0.73) | 2.71 (2.32 to 3.18)    | 0.89 (0.75 to 1.06) |
| From diagnosed with COVID-19 to hospitalised with COVID-19 | Heart disease          | 2.51 (2.37 to 2.67)    | 1.05 (0.98 to 1.12) | 2.71 (2.46 to 2.98)    | 1.17 (1.05 to 1.31) |
| From diagnosed with COVID-19 to hospitalised with COVID-19 | Hyperlipidemia         | 1.86 (1.74 to 1.98)    | 1.14 (1.07 to 1.21) | 1.61 (1.44 to 1.80)    | 1.04 (0.93 to 1.16) |
| From diagnosed with COVID-19 to hospitalised with COVID-19 | Hypertension           | 2.31 (2.18 to 2.44)    | 1.09 (1.03 to 1.16) | 2.12 (1.93 to 2.33)    | 1.06 (0.96 to 1.18) |
| From diagnosed with COVID-19 to hospitalised with COVID-19 | Malignant neoplasm     | 2.36 (2.18 to 2.55)    | 1.03 (0.95 to 1.12) | 2.36 (2.08 to 2.67)    | 1.11 (0.97 to 1.26) |
| From diagnosed with COVID-19 to hospitalised with COVID-19 | Obesity                | 2.30 (2.18 to 2.42)    | 1.60 (1.52 to 1.68) | 2.04 (1.87 to 2.23)    | 1.51 (1.38 to 1.65) |
| From diagnosed with COVID-19 to hospitalised with COVID-19 | Type 2 diabetes        | 3.13 (2.92 to 3.35)    | 1.38 (1.28 to 1.48) | 2.96 (2.65 to 3.32)    | 1.38 (1.22 to 1.55) |
| From diagnosed with COVID-19 to death                      | Charlson - 1:0         | 10.36 (8.47 to 12.67)  | 2.14 (1.83 to 2.50) | 16.95 (14.11 to 20.36) | 2.60 (2.15 to 3.14) |
| From diagnosed with COVID-19 to death                      | Charlson - 2:0         | 16.64 (13.69 to 20.22) | 1.78 (1.54 to 2.06) | 17.25 (14.20 to 20.96) | 1.59 (1.30 to 1.94) |
| From diagnosed with COVID-19 to death                      | Charlson - 3+:0        | 67.34 (56.96 to 79.59) | 2.69 (2.39 to 3.02) | 56.12 (47.58 to 66.18) | 2.41 (2.02 to 2.88) |
| From diagnosed with COVID-19 to death                      | Autoimmune condition   | 1.81 (1.49 to 2.19)    | 1.08 (0.89 to 1.32) | 2.00 (1.70 to 2.36)    | 1.14 (0.97 to 1.35) |
| From diagnosed with COVID-19 to death                      | Chronic kidney disease | 24.10 (21.34 to 27.23) | 5.92 (5.26 to 6.66) | 13.26 (11.88 to 14.80) | 1.07 (0.96 to 1.20) |
| From diagnosed with COVID-19 to death                      | COPD                   | 7.59 (6.31 to 9.12)    | 1.18 (0.98 to 1.42) | 4.60 (3.85 to 5.49)    | 0.97 (0.81 to 1.17) |
| From diagnosed with COVID-19 to death                      | Dementia               | 61.04 (53.62 to 69.48) | 2.61 (2.27 to 3.00) | 40.35 (36.33 to 44.81) | 2.86 (2.56 to 3.19) |
| From diagnosed with COVID-19 to death                      | Heart disease          | 10.07 (8.96 to 11.32)  | 1.09 (0.97 to 1.22) | 6.97 (6.28 to 7.74)    | 0.85 (0.76 to 0.94) |
| From diagnosed with COVID-19 to death                      | Hyperlipidemia         | 1.60 (1.36 to 1.88)    | 1.08 (0.92 to 1.28) | 1.52 (1.31 to 1.75)    | 0.95 (0.82 to 1.10) |
| From diagnosed with COVID-19 to death                      | Hypertension           | 3.85 (3.41 to 4.35)    | 1.01 (0.90 to 1.15) | 3.76 (3.37 to 4.19)    | 1.03 (0.93 to 1.15) |
| From diagnosed with COVID-19 to death                      | Malignant neoplasm     | 6.28 (5.47 to 7.21)    | 1.10 (0.96 to 1.26) | 5.42 (4.79 to 6.14)    | 1.18 (1.04 to 1.33) |
| From diagnosed with COVID-19 to death                      | Obesity                | 1.99 (1.75 to 2.26)    | 1.05 (0.92 to 1.19) | 1.27 (1.12 to 1.43)    | 0.79 (0.70 to 0.89) |
| From diagnosed with COVID-19 to death                      | Type 2 diabetes        | 6.60 (5.76 to 7.57)    | 1.57 (1.37 to 1.80) | 5.08 (4.48 to 5.75)    | 1.28 (1.13 to 1.45) |
| From hospitalised with COVID-19 to death                   | Charlson - 1:0         | 2.83 (2.43 to 3.29)    | 1.49 (1.28 to 1.74) | 5.25 (4.18 to 6.60)    | 2.01 (1.59 to 2.55) |
| From hospitalised with COVID-19 to death                   | Charlson - 2:0         | 3.18 (2.77 to 3.64)    | 1.44 (1.24 to 1.66) | 5.03 (4.04 to 6.26)    | 1.46 (1.16 to 1.85) |
| From hospitalised with COVID-19 to death                   | Charlson - 3+:0        | 5.77 (5.13 to 6.49)    | 1.85 (1.62 to 2.10) | 8.46 (6.98 to 10.24)   | 1.80 (1.45 to 2.22) |
| From hospitalised with COVID-19 to death                   | Autoimmune condition   | 1.35 (1.17 to 1.56)    | 1.16 (1.01 to 1.34) | 1.57 (1.29 to 1.90)    | 1.21 (1.00 to 1.48) |

|                                          |                        |                     |                     |                     |                     |
|------------------------------------------|------------------------|---------------------|---------------------|---------------------|---------------------|
| From hospitalised with COVID-19 to death | Chronic kidney disease | 3.17 (2.87 to 3.50) | 1.37 (1.23 to 1.52) | 3.41 (2.95 to 3.94) | 1.05 (0.91 to 1.22) |
| From hospitalised with COVID-19 to death | COPD                   | 2.39 (2.10 to 2.72) | 1.22 (1.07 to 1.39) | 1.87 (1.50 to 2.32) | 0.99 (0.79 to 1.23) |
| From hospitalised with COVID-19 to death | Dementia               | 4.36 (3.71 to 5.11) | 1.70 (1.44 to 2.01) | 6.52 (5.56 to 7.64) | 2.07 (1.76 to 2.44) |
| From hospitalised with COVID-19 to death | Heart disease          | 2.82 (2.57 to 3.09) | 1.25 (1.14 to 1.38) | 3.39 (2.96 to 3.88) | 1.13 (0.98 to 1.30) |
| From hospitalised with COVID-19 to death | Hyperlipidemia         | 1.11 (0.99 to 1.25) | 1.08 (0.96 to 1.21) | 0.94 (0.78 to 1.13) | 0.96 (0.80 to 1.16) |
| From hospitalised with COVID-19 to death | Hypertension           | 1.39 (1.27 to 1.53) | 1.04 (0.94 to 1.14) | 1.56 (1.35 to 1.80) | 1.05 (0.91 to 1.21) |
| From hospitalised with COVID-19 to death | Malignant neoplasm     | 2.29 (2.06 to 2.54) | 1.30 (1.16 to 1.44) | 2.18 (1.86 to 2.55) | 1.09 (0.92 to 1.28) |
| From hospitalised with COVID-19 to death | Obesity                | 1.18 (1.08 to 1.30) | 1.19 (1.08 to 1.30) | 1.02 (0.89 to 1.18) | 0.92 (0.79 to 1.06) |
| From hospitalised with COVID-19 to death | Type 2 diabetes        | 1.81 (1.63 to 2.01) | 1.27 (1.15 to 1.41) | 1.79 (1.54 to 2.09) | 1.22 (1.05 to 1.43) |

Figure 3. Comorbidities and COVID-19 transitions: stratified by calendar month (adjusted for age and sex)

Estimated hazard ratios for comorbidities of interest from cause-specific Cox models for each transition. Points give estimated hazard ratios, with lines representing 95% confidence intervals. Models were estimated separately for each comorbidity of interest, with adjustment for age and sex.

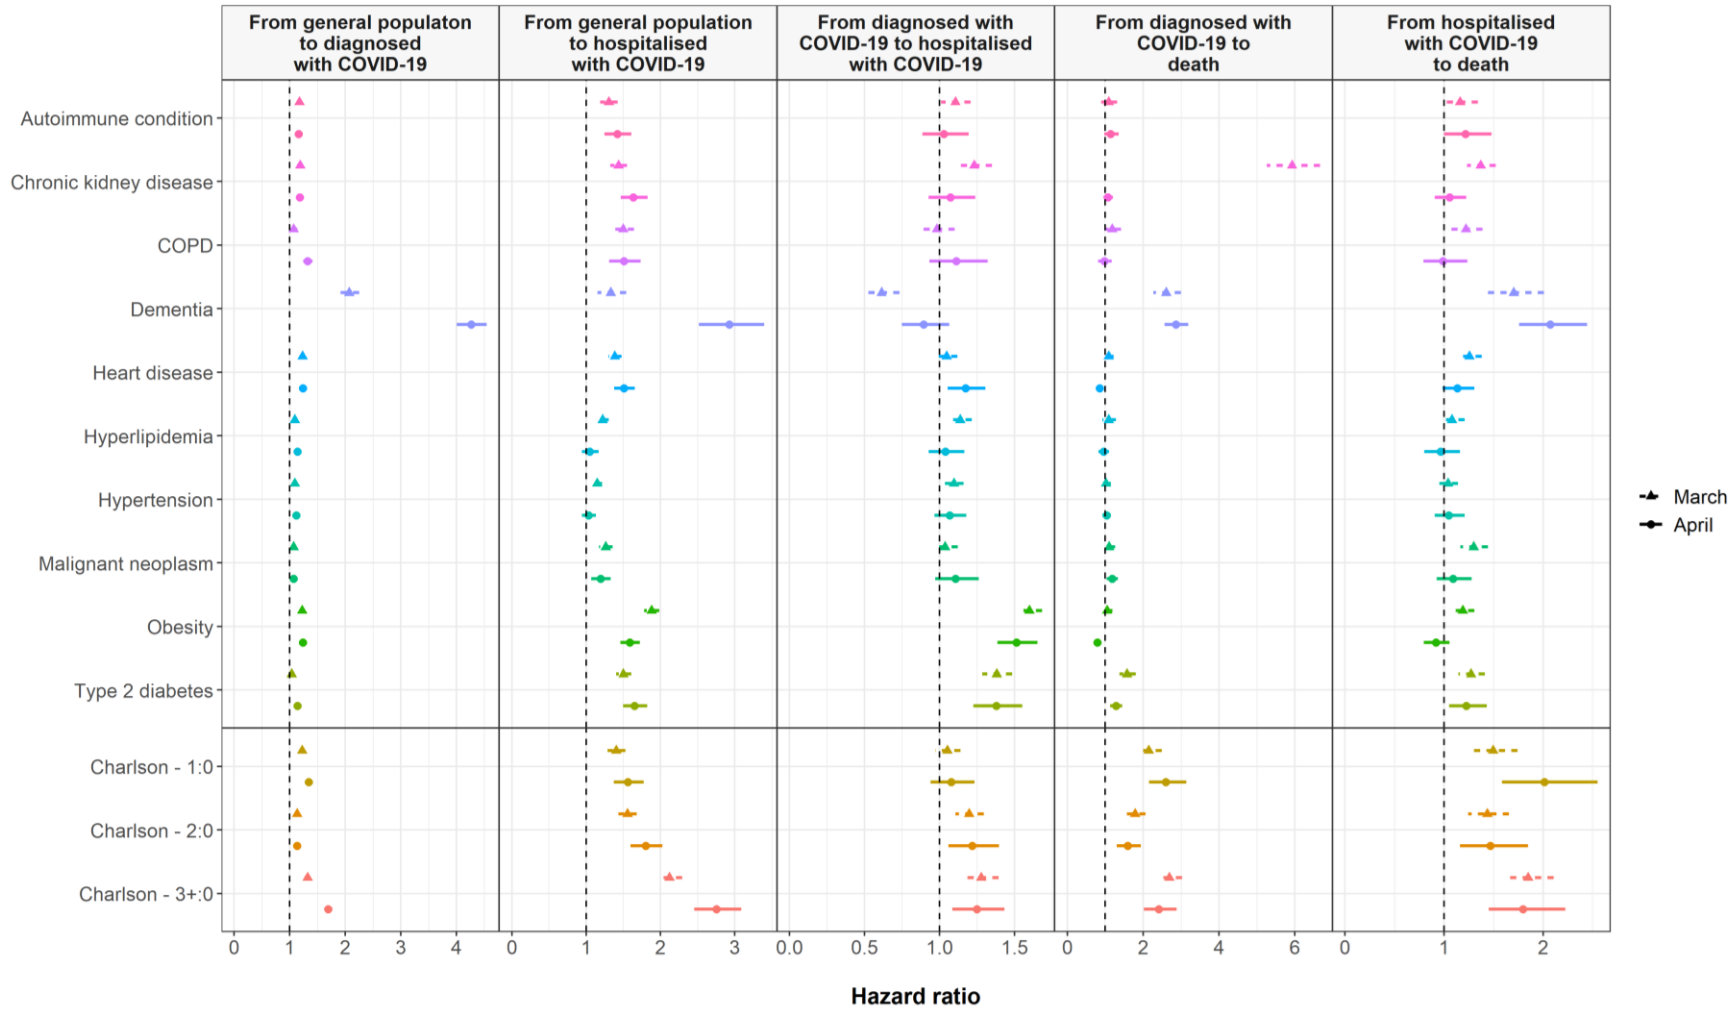



Table 21. Estimated hazard ratios for comorbidities: stratified by region

| Transition                                            | Variable               | Barcelona           |                          | Girona              |                          | Lleida              |                          | Tarragona           |                          |
|-------------------------------------------------------|------------------------|---------------------|--------------------------|---------------------|--------------------------|---------------------|--------------------------|---------------------|--------------------------|
|                                                       |                        | Unadjusted          | Adjusted for age and sex | Unadjusted          | Adjusted for age and sex | Unadjusted          | Adjusted for age and sex | Unadjusted          | Adjusted for age and sex |
| From general population to diagnosed with COVID-19    | Charlson - 1:0         | 1.30 (1.27 to 1.33) | 1.26 (1.23 to 1.30)      | 1.38 (1.26 to 1.51) | 1.52 (1.38 to 1.66)      | 1.23 (1.14 to 1.32) | 1.30 (1.21 to 1.40)      | 1.12 (1.00 to 1.26) | 1.20 (1.06 to 1.35)      |
| From general population to diagnosed with COVID-19    | Charlson - 2:0         | 1.10 (1.07 to 1.13) | 1.11 (1.08 to 1.14)      | 1.02 (0.92 to 1.14) | 1.26 (1.12 to 1.41)      | 1.03 (0.95 to 1.12) | 1.18 (1.08 to 1.28)      | 0.98 (0.86 to 1.12) | 1.17 (1.02 to 1.36)      |
| From general population to diagnosed with COVID-19    | Charlson - 3+:0        | 1.25 (1.21 to 1.29) | 1.42 (1.37 to 1.47)      | 1.17 (1.03 to 1.32) | 1.62 (1.41 to 1.86)      | 1.35 (1.24 to 1.48) | 1.75 (1.58 to 1.93)      | 1.26 (1.09 to 1.45) | 1.74 (1.48 to 2.04)      |
| From general population to diagnosed with COVID-19    | Autoimmune condition   | 1.30 (1.26 to 1.33) | 1.17 (1.14 to 1.21)      | 1.16 (1.03 to 1.29) | 1.14 (1.02 to 1.28)      | 1.25 (1.16 to 1.36) | 1.17 (1.08 to 1.27)      | 1.32 (1.16 to 1.50) | 1.28 (1.13 to 1.46)      |
| From general population to diagnosed with COVID-19    | Chronic kidney disease | 1.07 (1.04 to 1.11) | 1.15 (1.10 to 1.19)      | 0.93 (0.80 to 1.08) | 1.11 (0.94 to 1.32)      | 1.07 (0.96 to 1.19) | 1.24 (1.10 to 1.40)      | 1.11 (0.93 to 1.33) | 1.43 (1.17 to 1.75)      |
| From general population to diagnosed with COVID-19    | COPD                   | 1.05 (1.00 to 1.10) | 1.12 (1.07 to 1.18)      | 1.36 (1.17 to 1.57) | 1.63 (1.40 to 1.91)      | 1.16 (1.01 to 1.33) | 1.37 (1.19 to 1.58)      | 1.39 (1.14 to 1.69) | 1.70 (1.38 to 2.10)      |
| From general population to diagnosed with COVID-19    | Dementia               | 2.68 (2.55 to 2.81) | 3.10 (2.94 to 3.28)      | 2.31 (1.91 to 2.79) | 3.08 (2.50 to 3.80)      | 6.33 (5.70 to 7.03) | 3.58 (3.03 to 4.22)      | 1.98 (1.53 to 2.56) | 2.49 (1.88 to 3.31)      |
| From general population to diagnosed with COVID-19    | Heart disease          | 1.13 (1.11 to 1.16) | 1.21 (1.18 to 1.24)      | 1.01 (0.93 to 1.11) | 1.22 (1.10 to 1.34)      | 1.07 (1.00 to 1.14) | 1.23 (1.14 to 1.32)      | 1.18 (1.07 to 1.31) | 1.49 (1.33 to 1.67)      |
| From general population to diagnosed with COVID-19    | Hyperlipidemia         | 1.19 (1.16 to 1.21) | 1.09 (1.06 to 1.11)      | 1.06 (0.97 to 1.16) | 1.12 (1.02 to 1.23)      | 0.99 (0.92 to 1.07) | 0.99 (0.92 to 1.07)      | 1.08 (0.96 to 1.22) | 1.14 (1.01 to 1.29)      |
| From general population to diagnosed with COVID-19    | Hypertension           | 1.15 (1.13 to 1.17) | 1.10 (1.08 to 1.13)      | 0.99 (0.92 to 1.07) | 1.11 (1.02 to 1.21)      | 1.00 (0.94 to 1.06) | 1.06 (0.99 to 1.14)      | 1.00 (0.91 to 1.10) | 1.13 (1.02 to 1.26)      |
| From general population to diagnosed with COVID-19    | Malignant neoplasm     | 1.06 (1.03 to 1.09) | 1.04 (1.00 to 1.07)      | 0.97 (0.86 to 1.09) | 1.10 (0.97 to 1.25)      | 1.12 (1.02 to 1.22) | 1.19 (1.09 to 1.30)      | 0.99 (0.86 to 1.15) | 1.13 (0.97 to 1.31)      |
| From general population to diagnosed with COVID-19    | Obesity                | 1.33 (1.31 to 1.35) | 1.26 (1.23 to 1.28)      | 1.16 (1.08 to 1.24) | 1.19 (1.11 to 1.27)      | 1.27 (1.21 to 1.34) | 1.27 (1.20 to 1.33)      | 1.04 (0.96 to 1.12) | 1.04 (0.95 to 1.13)      |
| From general population to diagnosed with COVID-19    | Type 2 diabetes        | 1.06 (1.03 to 1.09) | 1.07 (1.04 to 1.10)      | 0.92 (0.82 to 1.03) | 1.07 (0.95 to 1.20)      | 1.03 (0.95 to 1.13) | 1.15 (1.05 to 1.26)      | 1.02 (0.89 to 1.16) | 1.21 (1.05 to 1.40)      |
| From general population to hospitalised with COVID-19 | Charlson - 1:0         | 3.28 (3.05 to 3.53) | 1.43 (1.33 to 1.54)      | 3.67 (2.42 to 5.58) | 1.53 (0.99 to 2.35)      | 2.89 (2.12 to 3.94) | 1.42 (1.03 to 1.96)      | 3.99 (2.66 to 5.99) | 1.82 (1.20 to 2.78)      |
| From general population to                            | Charlson - 2:0         | 4.88 (4.57 to       | 1.58 (1.48 to            | 5.24 (3.57 to       | 1.57 (1.04 to            | 5.75 (4.46 to       | 2.02 (1.52 to            | 4.59 (3.03 to       | 1.47 (0.94 to            |

|                                                            |                        |                      |                     |                       |                     |                      |                     |                       |                     |
|------------------------------------------------------------|------------------------|----------------------|---------------------|-----------------------|---------------------|----------------------|---------------------|-----------------------|---------------------|
| hospitalised with COVID-19                                 |                        | 5.21)                | 1.70)               | 7.70)                 | 2.38)               | 7.42)                | 2.67)               | 6.95)                 | 2.30)               |
| From general population to hospitalised with COVID-19      | Charlson - 3+:0        | 8.93 (8.43 to 9.46)  | 2.23 (2.08 to 2.39) | 10.80 (7.72 to 15.12) | 2.32 (1.57 to 3.44) | 9.80 (7.69 to 12.47) | 2.52 (1.89 to 3.36) | 10.55 (7.41 to 15.01) | 2.49 (1.65 to 3.76) |
| From general population to hospitalised with COVID-19      | Autoimmune condition   | 2.19 (2.02 to 2.36)  | 1.36 (1.26 to 1.47) | 3.39 (2.34 to 4.92)   | 2.03 (1.40 to 2.96) | 2.02 (1.48 to 2.77)  | 1.20 (0.87 to 1.65) | 1.96 (1.22 to 3.14)   | 1.19 (0.74 to 1.91) |
| From general population to hospitalised with COVID-19      | Chronic kidney disease | 5.50 (5.17 to 5.84)  | 1.46 (1.37 to 1.56) | 5.36 (3.70 to 7.78)   | 1.20 (0.80 to 1.79) | 6.59 (5.17 to 8.41)  | 1.62 (1.23 to 2.13) | 6.59 (4.54 to 9.59)   | 1.59 (1.06 to 2.40) |
| From general population to hospitalised with COVID-19      | COPD                   | 4.63 (4.27 to 5.01)  | 1.49 (1.37 to 1.61) | 4.68 (3.01 to 7.27)   | 1.36 (0.86 to 2.13) | 3.80 (2.59 to 5.58)  | 1.20 (0.81 to 1.78) | 6.76 (4.38 to 10.43)  | 2.11 (1.35 to 3.30) |
| From general population to hospitalised with COVID-19      | Dementia               | 7.62 (6.88 to 8.44)  | 1.91 (1.72 to 2.13) | 6.46 (3.53 to 11.81)  | 1.40 (0.75 to 2.63) | 8.19 (5.24 to 12.82) | 1.82 (1.14 to 2.90) | 5.28 (2.60 to 10.71)  | 1.15 (0.56 to 2.39) |
| From general population to hospitalised with COVID-19      | Heart disease          | 4.47 (4.25 to 4.69)  | 1.39 (1.32 to 1.47) | 6.17 (4.68 to 8.13)   | 1.78 (1.30 to 2.43) | 4.78 (3.91 to 5.86)  | 1.46 (1.16 to 1.83) | 5.29 (3.94 to 7.10)   | 1.60 (1.15 to 2.22) |
| From general population to hospitalised with COVID-19      | Hyperlipidemia         | 2.18 (2.06 to 2.32)  | 1.11 (1.05 to 1.18) | 2.12 (1.47 to 3.04)   | 1.18 (0.82 to 1.71) | 2.16 (1.65 to 2.83)  | 1.16 (0.88 to 1.52) | 2.16 (1.46 to 3.21)   | 1.26 (0.84 to 1.87) |
| From general population to hospitalised with COVID-19      | Hypertension           | 3.06 (2.91 to 3.22)  | 1.11 (1.05 to 1.17) | 3.40 (2.56 to 4.52)   | 1.22 (0.91 to 1.63) | 2.97 (2.41 to 3.66)  | 1.10 (0.89 to 1.37) | 2.70 (1.97 to 3.68)   | 1.03 (0.75 to 1.42) |
| From general population to hospitalised with COVID-19      | Malignant neoplasm     | 9.67 (9.22 to 10.15) | 1.23 (1.16 to 1.31) | 9.50 (7.14 to 12.65)  | 1.10 (0.75 to 1.62) | 3.98 (3.09 to 5.13)  | 1.38 (1.06 to 1.80) | 2.65 (1.73 to 4.06)   | 0.86 (0.55 to 1.33) |
| From general population to hospitalised with COVID-19      | Obesity                | 3.45 (3.29 to 3.61)  | 1.82 (1.73 to 1.91) | 3.13 (2.37 to 4.12)   | 1.70 (1.29 to 2.26) | 3.51 (2.90 to 4.26)  | 2.00 (1.64 to 2.44) | 2.28 (1.70 to 3.06)   | 1.23 (0.91 to 1.66) |
| From general population to hospitalised with COVID-19      | Type 2 diabetes        | 4.36 (4.11 to 4.61)  | 1.55 (1.47 to 1.65) | 3.77 (2.69 to 5.28)   | 1.29 (0.92 to 1.83) | 4.09 (3.21 to 5.21)  | 1.53 (1.20 to 1.97) | 3.47 (2.41 to 5.00)   | 1.29 (0.89 to 1.87) |
| From diagnosed with COVID-19 to hospitalised with COVID-19 | Charlson - 1:0         | 1.78 (1.66 to 1.92)  | 1.04 (0.97 to 1.12) | 1.55 (1.11 to 2.18)   | 0.83 (0.59 to 1.17) | 1.86 (1.45 to 2.38)  | 1.15 (0.89 to 1.49) | 1.50 (0.94 to 2.40)   | 0.80 (0.50 to 1.31) |
| From diagnosed with COVID-19 to hospitalised with COVID-19 | Charlson - 2:0         | 2.63 (2.45 to 2.81)  | 1.16 (1.08 to 1.25) | 3.18 (2.35 to 4.31)   | 1.17 (0.84 to 1.62) | 3.53 (2.83 to 4.41)  | 1.63 (1.28 to 2.07) | 2.50 (1.61 to 3.90)   | 0.98 (0.61 to 1.57) |
| From diagnosed with COVID-19 to hospitalised with COVID-19 | Charlson - 3+:0        | 3.51 (3.29 to 3.75)  | 1.17 (1.08 to 1.26) | 6.07 (4.67 to 7.90)   | 1.74 (1.25 to 2.43) | 4.06 (3.25 to 5.08)  | 1.39 (1.06 to 1.83) | 4.02 (2.73 to 5.92)   | 1.10 (0.70 to 1.75) |
| From diagnosed with COVID-19 to hospitalised with COVID-19 | Autoimmune condition   | 1.36 (1.25 to 1.48)  | 1.07 (0.98 to 1.16) | 1.74 (1.24 to 2.44)   | 1.17 (0.83 to 1.65) | 1.55 (1.19 to 2.02)  | 1.11 (0.85 to 1.45) | 1.88 (1.23 to 2.87)   | 1.27 (0.83 to 1.96) |
| From diagnosed with COVID-19 to hospitalised with COVID-19 | Chronic kidney disease | 3.10 (2.87 to 3.34)  | 1.18 (1.08 to 1.28) | 4.31 (3.13 to 5.93)   | 1.40 (0.97 to 2.00) | 3.47 (2.69 to 4.48)  | 1.20 (0.90 to 1.59) | 2.91 (1.77 to 4.78)   | 0.90 (0.52 to 1.55) |
| From diagnosed with COVID-19                               | COPD                   | 2.61 (2.36 to        | 0.99 (0.89 to       | 2.85 (1.96 to         | 0.96 (0.65 to       | 2.51 (1.74 to        | 0.96 (0.66 to       | 7.22 (4.90 to         | 1.02 (0.58 to       |

|                                                            |                        |                        |                     |                          |                     |                         |                     |                        |                      |
|------------------------------------------------------------|------------------------|------------------------|---------------------|--------------------------|---------------------|-------------------------|---------------------|------------------------|----------------------|
| to hospitalised with COVID-19                              |                        | 2.89)                  | 1.10)               | 4.13)                    | 1.41)               | 3.62)                   | 1.40)               | 10.62)                 | 1.79)                |
| From diagnosed with COVID-19 to hospitalised with COVID-19 | Dementia               | 1.95 (1.72 to 2.21)    | 0.65 (0.57 to 0.74) | 1.83 (1.06 to 3.17)      | 0.50 (0.28 to 0.91) | 3.33 (2.34 to 4.75)     | 1.07 (0.72 to 1.59) | 1.04 (0.33 to 3.24)    | 0.30 (0.093 to 0.96) |
| From diagnosed with COVID-19 to hospitalised with COVID-19 | Heart disease          | 2.43 (2.30 to 2.56)    | 1.05 (0.99 to 1.11) | 3.86 (3.08 to 4.82)      | 1.56 (1.22 to 1.99) | 2.56 (2.12 to 3.10)     | 1.03 (0.83 to 1.29) | 3.06 (2.23 to 4.18)    | 1.21 (0.85 to 1.73)  |
| From diagnosed with COVID-19 to hospitalised with COVID-19 | Hyperlipidemia         | 1.79 (1.69 to 1.90)    | 1.11 (1.04 to 1.18) | 1.84 (1.39 to 2.42)      | 1.13 (0.86 to 1.50) | 1.37 (1.05 to 1.78)     | 0.84 (0.64 to 1.09) | 1.47 (0.95 to 2.27)    | 0.84 (0.54 to 1.30)  |
| From diagnosed with COVID-19 to hospitalised with COVID-19 | Hypertension           | 2.23 (2.11 to 2.34)    | 1.09 (1.03 to 1.15) | 2.20 (1.75 to 2.78)      | 0.92 (0.72 to 1.17) | 2.32 (1.94 to 2.79)     | 1.09 (0.90 to 1.32) | 2.33 (1.70 to 3.20)    | 0.96 (0.69 to 1.34)  |
| From diagnosed with COVID-19 to hospitalised with COVID-19 | Malignant neoplasm     | 2.25 (2.10 to 2.42)    | 1.04 (0.96 to 1.12) | 2.85 (2.10 to 3.88)      | 1.02 (0.74 to 1.41) | 2.71 (2.15 to 3.41)     | 1.26 (0.99 to 1.60) | 2.66 (1.74 to 4.07)    | 1.13 (0.73 to 1.76)  |
| From diagnosed with COVID-19 to hospitalised with COVID-19 | Obesity                | 2.20 (2.10 to 2.31)    | 1.57 (1.50 to 1.65) | 2.19 (1.78 to 2.70)      | 1.38 (1.11 to 1.70) | 2.24 (1.91 to 2.63)     | 1.70 (1.44 to 2.00) | 2.34 (1.76 to 3.12)    | 1.52 (1.14 to 2.04)  |
| From diagnosed with COVID-19 to hospitalised with COVID-19 | Type 2 diabetes        | 2.89 (2.71 to 3.09)    | 1.30 (1.22 to 1.39) | 3.69 (2.82 to 4.81)      | 1.34 (1.01 to 1.77) | 4.16 (3.40 to 5.09)     | 2.00 (1.62 to 2.47) | 2.86 (1.94 to 4.21)    | 1.09 (0.73 to 1.63)  |
| From diagnosed with COVID-19 to death                      | Charlson - 1:0         | 14.02 (12.10 to 16.23) | 2.49 (2.14 to 2.90) | 15.45 (7.55 to 31.60)    | 2.24 (1.08 to 4.67) | 14.23 (8.91 to 22.73)   | 2.87 (1.77 to 4.64) | 9.38 (5.12 to 17.18)   | 1.49 (0.79 to 2.80)  |
| From diagnosed with COVID-19 to death                      | Charlson - 2:0         | 16.86 (14.50 to 19.61) | 1.66 (1.42 to 1.95) | 29.54 (14.70 to 59.37)   | 2.55 (1.25 to 5.21) | 17.42 (10.66 to 28.46)  | 1.88 (1.13 to 3.11) | 13.29 (7.19 to 24.55)  | 1.13 (0.60 to 2.15)  |
| From diagnosed with COVID-19 to death                      | Charlson - 3+:0        | 65.01 (57.17 to 73.93) | 2.66 (2.31 to 3.06) | 101.52 (54.22 to 190.09) | 2.96 (1.52 to 5.77) | 74.80 (49.95 to 112.02) | 2.81 (1.82 to 4.32) | 27.34 (15.82 to 47.25) | 1.04 (0.57 to 1.87)  |
| From diagnosed with COVID-19 to death                      | Autoimmune condition   | 1.77 (1.54 to 2.04)    | 1.07 (0.93 to 1.23) | 3.31 (1.97 to 5.55)      | 1.71 (1.02 to 2.88) | 2.69 (1.85 to 3.92)     | 1.35 (0.92 to 1.96) | 1.77 (0.92 to 3.41)    | 0.97 (0.50 to 1.87)  |
| From diagnosed with COVID-19 to death                      | Chronic kidney disease | 17.74 (16.22 to 19.39) | 1.22 (1.11 to 1.33) | 21.88 (14.65 to 32.67)   | 1.28 (0.86 to 1.91) | 26.26 (19.98 to 34.51)  | 1.65 (1.25 to 2.19) | 14.38 (9.00 to 22.96)  | 0.83 (0.51 to 1.35)  |
| From diagnosed with COVID-19 to death                      | COPD                   | 5.79 (5.02 to 6.68)    | 1.07 (0.92 to 1.24) | 5.82 (3.32 to 10.21)     | 0.95 (0.53 to 1.70) | 6.46 (4.12 to 10.12)    | 1.03 (0.65 to 1.63) | 10.78 (6.37 to 18.26)  | 1.44 (0.84 to 2.47)  |
| From diagnosed with COVID-19 to death                      | Dementia               | 56.40 (51.63 to 61.61) | 3.04 (2.77 to 3.34) | 43.20 (29.26 to 63.77)   | 1.93 (1.29 to 2.90) | 43.72 (32.81 to 58.24)  | 2.03 (1.50 to 2.75) | 38.98 (24.75 to 61.40) | 2.30 (1.44 to 3.66)  |
| From diagnosed with COVID-19 to death                      | Heart disease          | 8.31 (7.64 to 9.05)    | 0.96 (0.88 to 1.04) | 7.61 (5.18 to 11.19)     | 1.03 (0.70 to 1.53) | 9.39 (7.19 to 12.27)    | 0.84 (0.63 to 1.11) | 10.55 (7.01 to 15.89)  | 1.06 (0.69 to 1.62)  |
| From diagnosed with COVID-19 to death                      | Hyperlipidemia         | 1.59 (1.41 to 1.78)    | 1.04 (0.93 to 1.17) | 1.96 (1.17 to 3.29)      | 0.97 (0.58 to 1.63) | 0.98 (0.58 to 1.66)     | 0.63 (0.37 to 1.06) | 1.16 (0.56 to 2.40)    | 1.06 (0.50 to 2.23)  |
| From diagnosed with COVID-19 to death                      | Hypertension           | 3.80 (3.48 to 4.12)    | 1.05 (0.96 to 1.14) | 3.79 (2.55 to 5.03)      | 0.84 (0.56 to 1.12) | 3.67 (2.75 to 4.59)     | 0.83 (0.62 to 1.04) | 4.31 (2.81 to 5.81)    | 0.91 (0.59 to 1.23)  |

|                                          |                        |                     |                     |                      |                     |                      |                     |                      |                      |
|------------------------------------------|------------------------|---------------------|---------------------|----------------------|---------------------|----------------------|---------------------|----------------------|----------------------|
| to death                                 |                        | 4.15)               | 1.15)               | 5.64)                | 1.25)               | 4.89)                | 1.11)               | 6.60)                | 1.40)                |
| From diagnosed with COVID-19 to death    | Malignant neoplasm     | 5.76 (5.20 to 6.36) | 1.13 (1.02 to 1.25) | 6.60 (4.19 to 10.39) | 0.94 (0.58 to 1.50) | 7.61 (5.64 to 10.29) | 1.50 (1.11 to 2.04) | 4.08 (2.35 to 7.10)  | 0.67 (0.38 to 1.17)  |
| From diagnosed with COVID-19 to death    | Obesity                | 1.66 (1.51 to 1.83) | 0.93 (0.85 to 1.03) | 1.33 (0.85 to 2.08)  | 0.72 (0.46 to 1.15) | 1.10 (0.79 to 1.54)  | 0.82 (0.59 to 1.14) | 1.24 (0.75 to 2.03)  | 0.65 (0.39 to 1.07)  |
| From diagnosed with COVID-19 to death    | Type 2 diabetes        | 5.69 (5.14 to 6.29) | 1.38 (1.24 to 1.52) | 8.27 (5.45 to 12.56) | 1.57 (1.03 to 2.39) | 6.08 (4.40 to 8.40)  | 1.83 (1.31 to 2.54) | 7.04 (4.44 to 11.15) | 1.51 (0.95 to 2.41)  |
| From hospitalised with COVID-19 to death | Charlson - 1:0         | 3.41 (2.99 to 3.89) | 1.64 (1.43 to 1.88) | 3.11 (1.51 to 6.41)  | 1.82 (0.86 to 3.84) | 3.36 (1.98 to 5.68)  | 1.67 (0.98 to 2.86) | 4.98 (2.02 to 12.27) | 3.44 (1.35 to 8.76)  |
| From hospitalised with COVID-19 to death | Charlson - 2:0         | 3.61 (3.19 to 4.08) | 1.42 (1.25 to 1.61) | 4.14 (2.21 to 7.77)  | 2.16 (1.11 to 4.21) | 3.34 (2.08 to 5.38)  | 1.43 (0.88 to 2.35) | 3.60 (1.34 to 9.68)  | 2.04 (0.71 to 5.83)  |
| From hospitalised with COVID-19 to death | Charlson - 3+:0        | 6.40 (5.75 to 7.11) | 1.76 (1.57 to 1.98) | 7.22 (4.20 to 12.40) | 2.86 (1.55 to 5.29) | 6.97 (4.63 to 10.50) | 1.90 (1.22 to 2.97) | 6.42 (2.90 to 14.20) | 3.55 (1.45 to 8.69)  |
| From hospitalised with COVID-19 to death | Autoimmune condition   | 1.49 (1.32 to 1.68) | 1.23 (1.09 to 1.39) | 1.05 (0.56 to 1.97)  | 0.88 (0.46 to 1.65) | 1.19 (0.73 to 1.95)  | 1.09 (0.66 to 1.78) | 0.36 (0.088 to 1.51) | 0.34 (0.082 to 1.40) |
| From hospitalised with COVID-19 to death | Chronic kidney disease | 3.20 (2.93 to 3.49) | 1.24 (1.13 to 1.36) | 4.76 (3.07 to 7.38)  | 1.78 (1.07 to 2.96) | 3.10 (2.21 to 4.35)  | 1.09 (0.76 to 1.57) | 3.28 (1.72 to 6.25)  | 1.57 (0.76 to 3.24)  |
| From hospitalised with COVID-19 to death | COPD                   | 2.24 (1.99 to 2.52) | 1.14 (1.02 to 1.29) | 2.33 (1.36 to 3.99)  | 1.40 (0.81 to 2.43) | 1.32 (0.70 to 2.51)  | 0.64 (0.33 to 1.22) | 3.03 (1.50 to 6.12)  | 2.06 (1.01 to 4.21)  |
| From hospitalised with COVID-19 to death | Dementia               | 5.70 (5.08 to 6.39) | 2.03 (1.81 to 2.29) | 2.32 (1.07 to 5.02)  | 0.91 (0.41 to 2.01) | 4.27 (2.66 to 6.83)  | 1.41 (0.87 to 2.28) | 5.23 (1.86 to 14.68) | 3.19 (1.12 to 9.08)  |
| From hospitalised with COVID-19 to death | Heart disease          | 3.06 (2.82 to 3.31) | 1.26 (1.15 to 1.37) | 1.97 (1.31 to 2.96)  | 0.86 (0.55 to 1.35) | 2.97 (2.17 to 4.07)  | 1.02 (0.73 to 1.44) | 2.38 (1.32 to 4.26)  | 1.35 (0.71 to 2.55)  |
| From hospitalised with COVID-19 to death | Hyperlipidemia         | 1.06 (0.96 to 1.17) | 1.05 (0.95 to 1.16) | 0.52 (0.26 to 1.04)  | 0.47 (0.24 to 0.94) | 1.24 (0.79 to 1.94)  | 1.20 (0.76 to 1.89) | 1.25 (0.56 to 2.80)  | 1.30 (0.57 to 2.95)  |
| From hospitalised with COVID-19 to death | Hypertension           | 1.44 (1.32 to 1.57) | 1.05 (0.97 to 1.15) | 0.89 (0.56 to 1.41)  | 0.69 (0.43 to 1.10) | 1.59 (1.15 to 2.21)  | 1.12 (0.81 to 1.57) | 1.37 (0.74 to 2.54)  | 0.95 (0.50 to 1.78)  |
| From hospitalised with COVID-19 to death | Malignant neoplasm     | 2.21 (2.02 to 2.43) | 1.18 (1.07 to 1.30) | 2.37 (1.47 to 3.82)  | 1.61 (0.99 to 2.62) | 2.54 (1.80 to 3.60)  | 1.47 (1.03 to 2.09) | 2.07 (1.03 to 4.18)  | 1.31 (0.63 to 2.73)  |
| From hospitalised with COVID-19 to death | Obesity                | 1.11 (1.02 to 1.21) | 1.08 (0.99 to 1.17) | 1.08 (0.71 to 1.65)  | 1.05 (0.68 to 1.62) | 1.29 (0.94 to 1.76)  | 1.36 (0.99 to 1.87) | 1.27 (0.70 to 2.31)  | 1.19 (0.65 to 2.16)  |
| From hospitalised with COVID-19 to death | Type 2 diabetes        | 1.79 (1.63 to 1.96) | 1.24 (1.13 to 1.36) | 2.07 (1.32 to 3.23)  | 1.29 (0.81 to 2.03) | 1.74 (1.23 to 2.47)  | 1.35 (0.94 to 1.92) | 2.48 (1.32 to 4.66)  | 2.00 (1.05 to 3.80)  |

Figure 4. Comorbidities and COVID-19 transitions: stratified by region (adjusted for age and sex)

Estimated hazard ratios for comorbidities of interest from cause-specific Cox models for each transition. Points give estimated hazard ratios, with lines representing 95% confidence intervals. Models were estimated separately for each comorbidity of interest, with adjustment for age and sex.

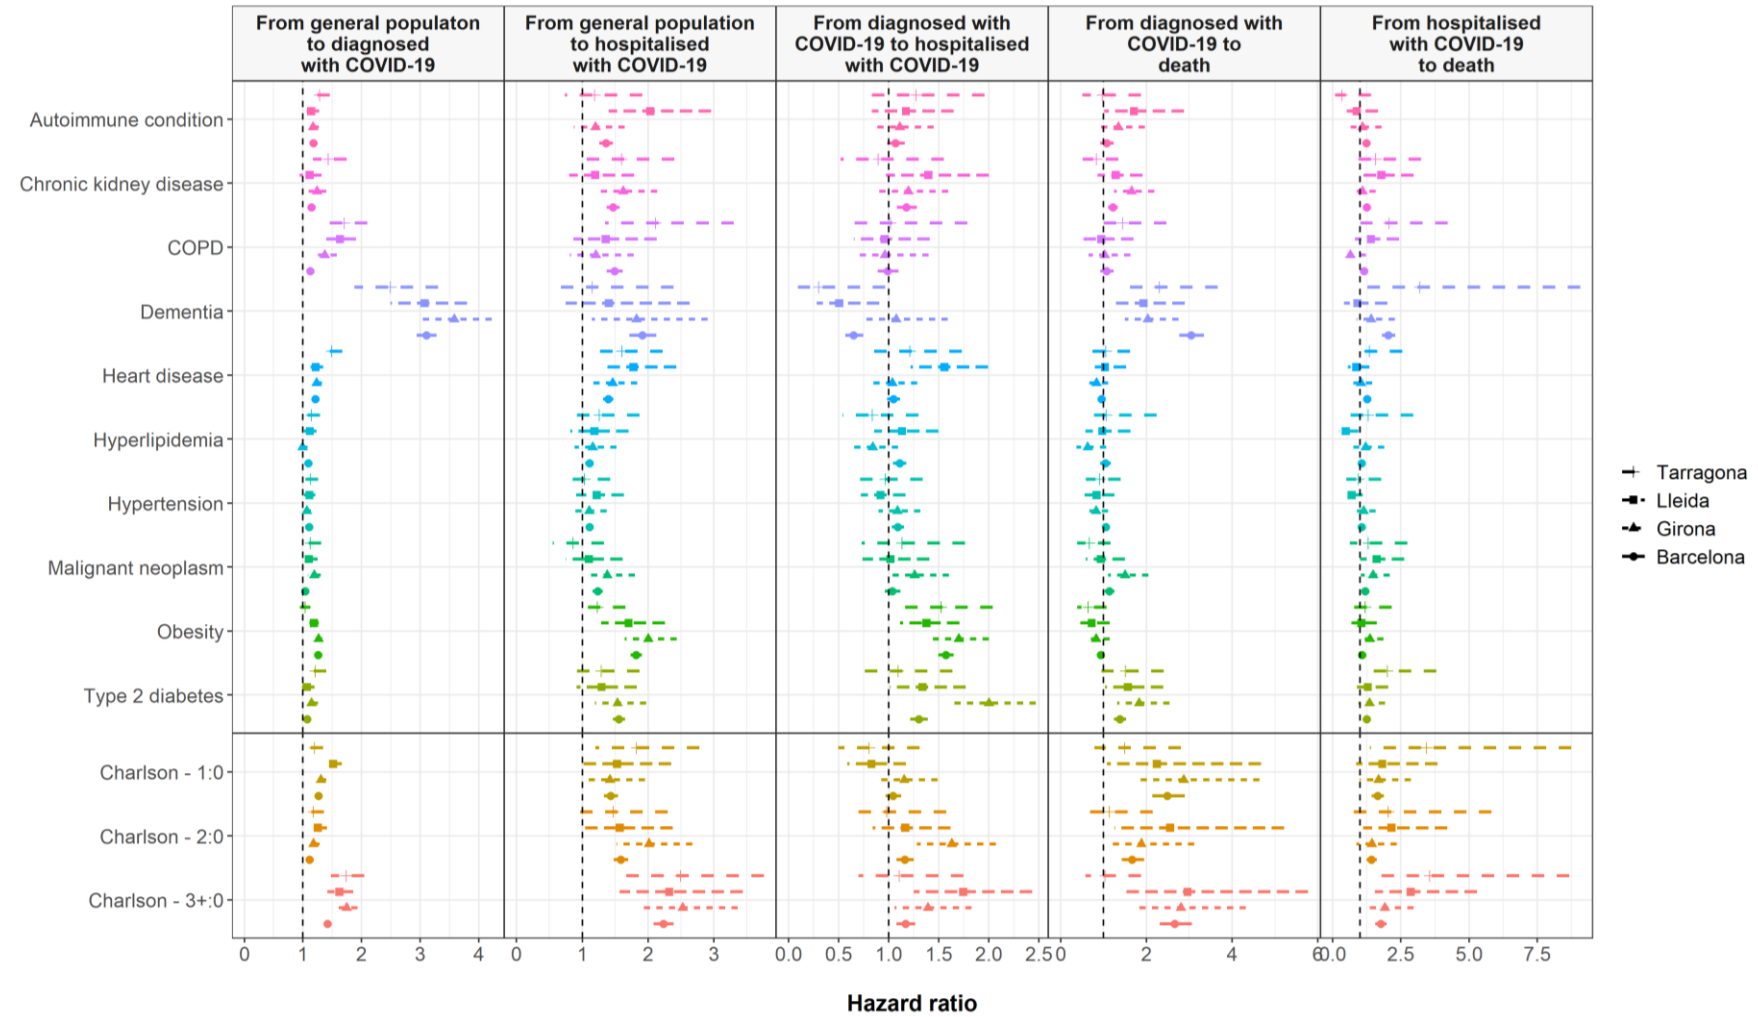

Supplement: 41467_2021_21100_MOESM1_ESM.pdf [file 41467_2021_21100_MOESM1_ESM.pdf]
